# Supplementary material
Source: publisher figshare collection journal article supplement (https://acs.figshare.com/ndownloader/files/24043553)
Supplement: Supplementary file 1 [file 24043553]

## Supplementary Material

### **Design, synthesis, and biological evaluation of novel multifunctional Rolipram-Tranilast hybrids as potential treatment for traumatic brain injury**

Junfeng Lu<sup>1§</sup>, Chen Chen<sup>1§</sup>, Xiaobing Deng<sup>2§</sup>, Marvin SH Mak<sup>3,4</sup>, Zeyu Zhu<sup>1</sup>, Xixin He<sup>5</sup>, Jinhao Liang<sup>5</sup>, Swetha K. Maddili<sup>6</sup>, Karl W. K. Tsim<sup>4</sup>, Yifan Han<sup>3</sup>, Rongbiao Pi<sup>6,7,8\*</sup>

- 1. School of Pharmaceutical Sciences, Sun Yat-Sen University, Guangzhou 510006, China;*
- 2. Peking-Tsinghua Center for Life Sciences, Peking University, Beijing 100871, China.*
- 3. Department of Applied Biology and Chemical Technology, Institute of Modern Chinese Medicine, The Hong Kong Polytechnic University, Hung Hom, Hong Kong;*
- 4. Division of Life Science and Center for Chinese Medicine, The Hong Kong University of Science and Technology, Hong Kong, China;*
- 5. School of Pharmaceutical Sciences, Guangzhou University of Chinese Medicine, Guangzhou, China.*
- 6. School of Medicine, Sun Yat-Sen University, Guangzhou 518000, China;*
- 7. National and Local United Engineering Lab of Drugability and New Drugs Evaluation, Sun Yat-Sen University, Guangzhou 510006, China;*
- 8. International Joint Laboratory<SYSU-PolyU HK> of Novel Anti-Dementia Drugs of Guangzhou, Guangzhou 510006, China.*

<sup>§</sup> The first three authors contributed equally.

## Contents

### $^1\text{H}$ NMR and $^{13}\text{C}$ NMR of final compounds **3-14**, **15-26**

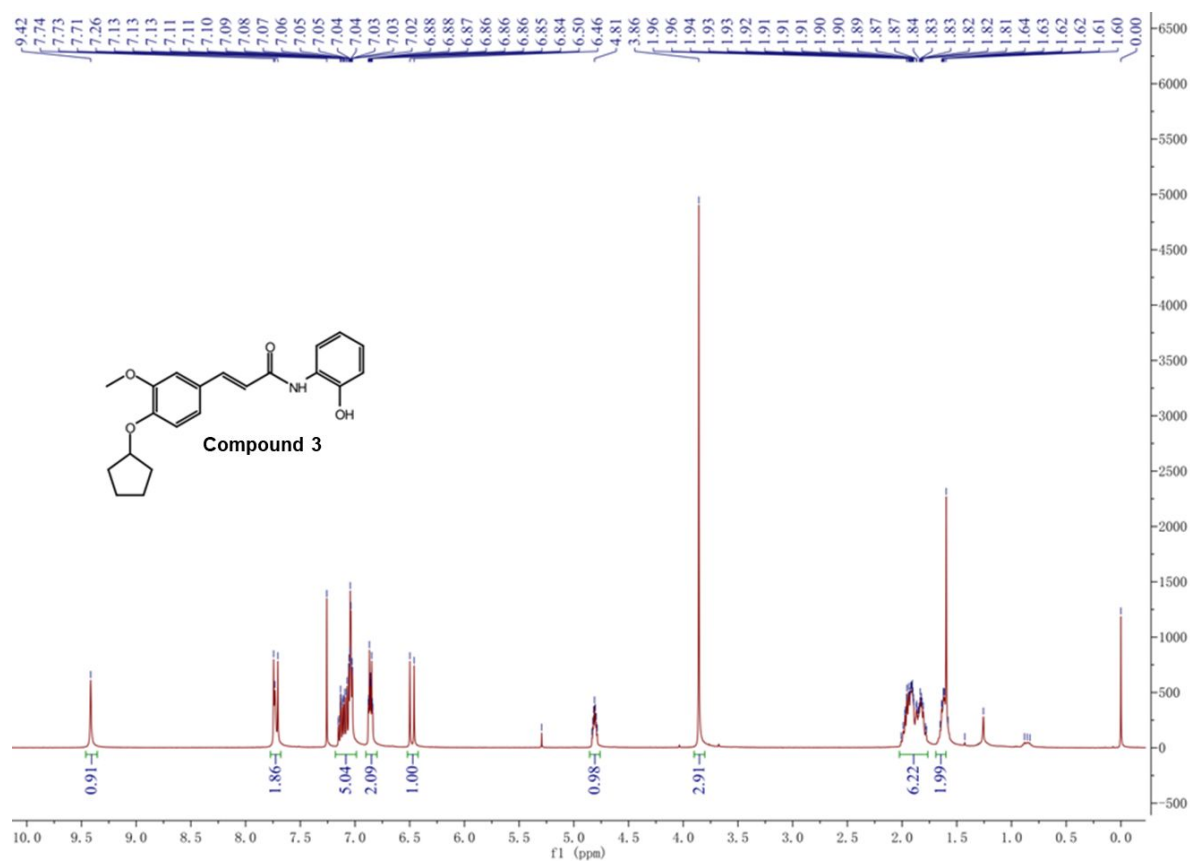

$^1\text{H}$  NMR compound **3**

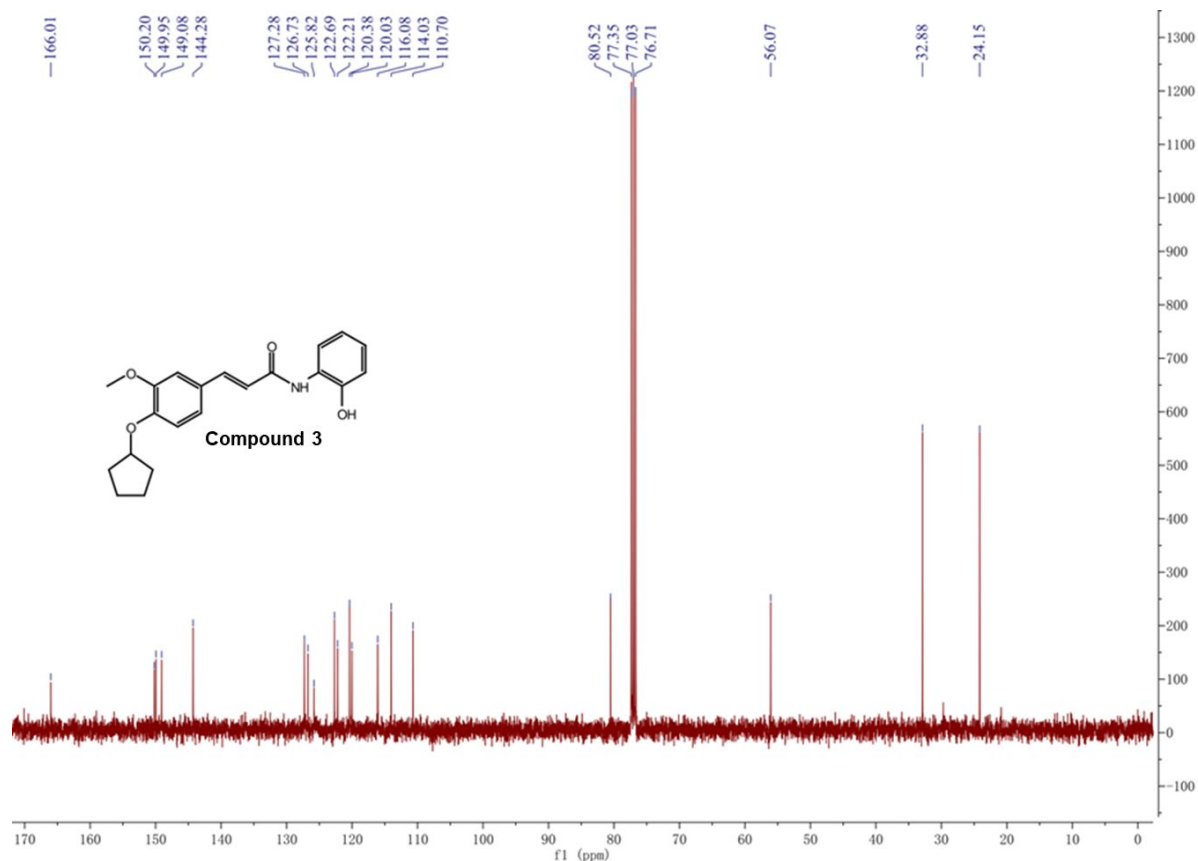

$^{13}\text{C}$  NMR compound 3

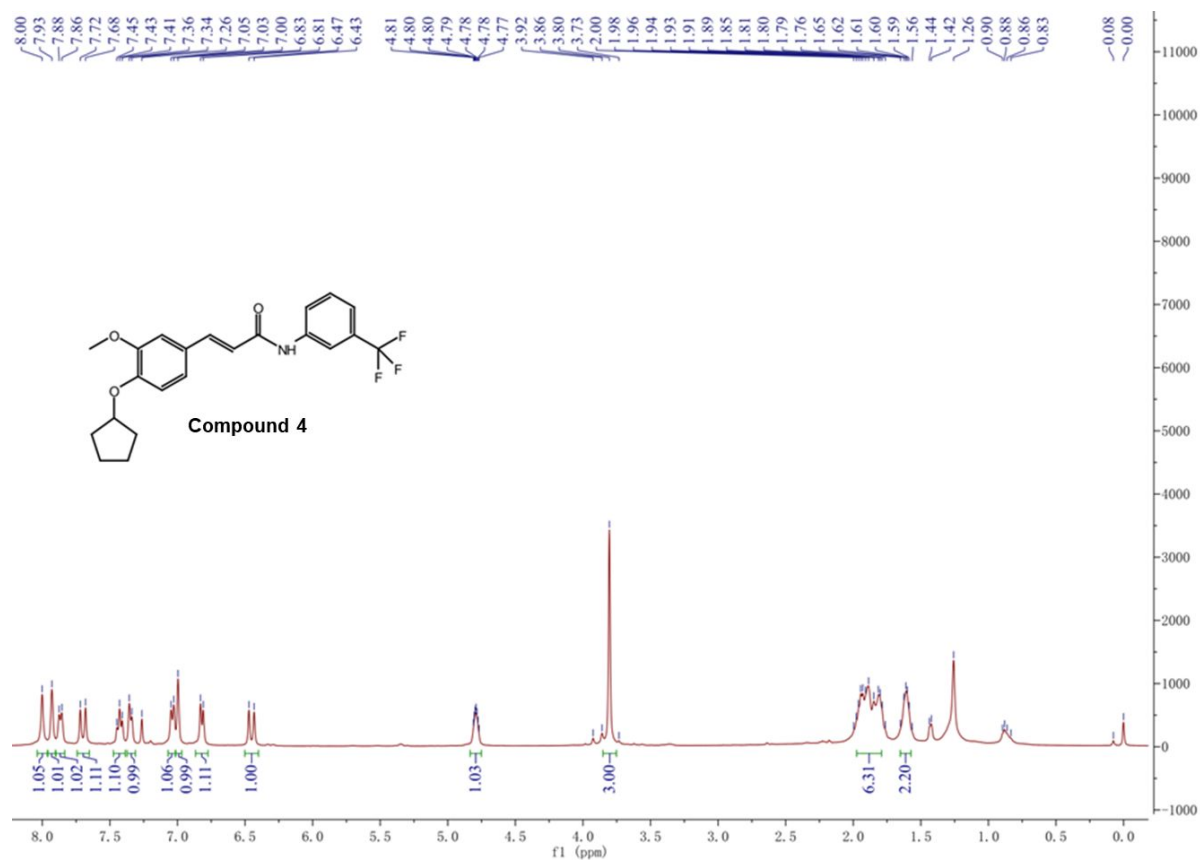

$^1\text{H}$  NMR compound 4

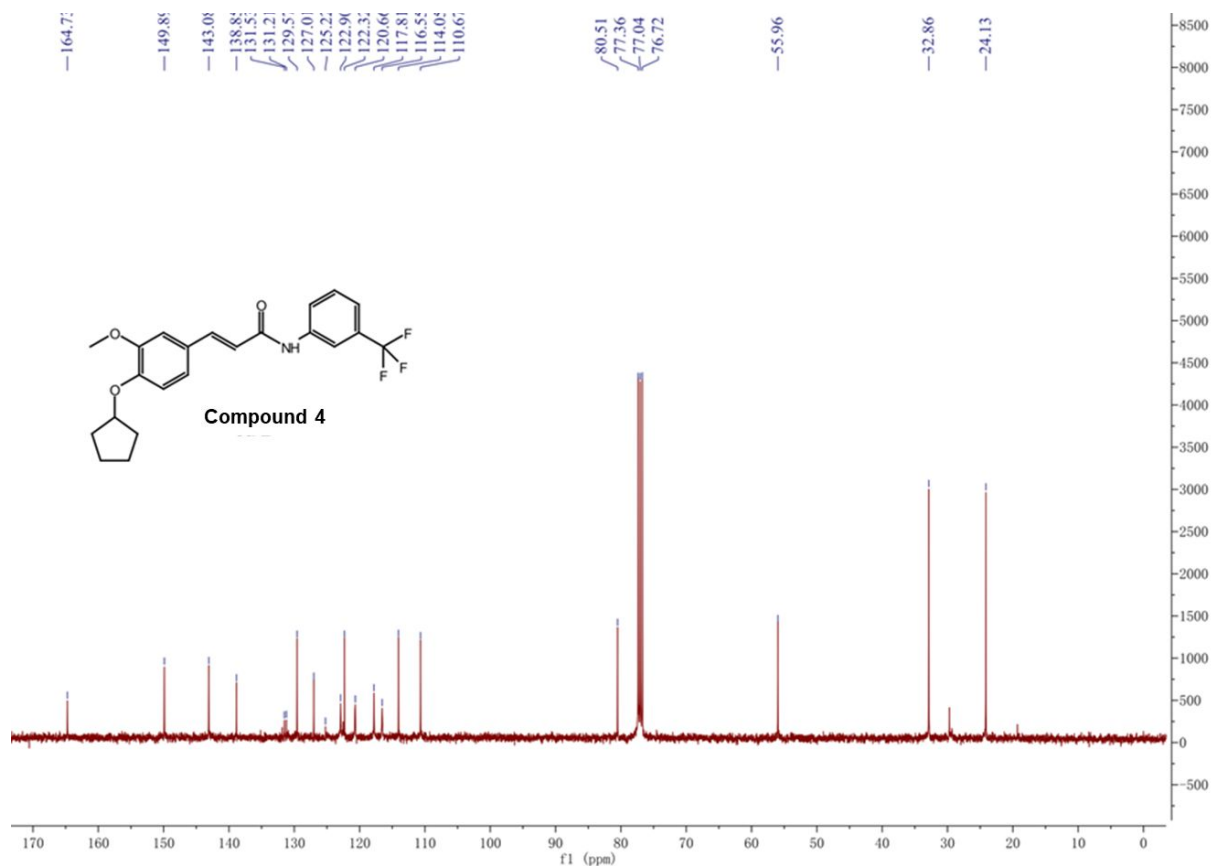

<sup>13</sup>C NMR compound 4

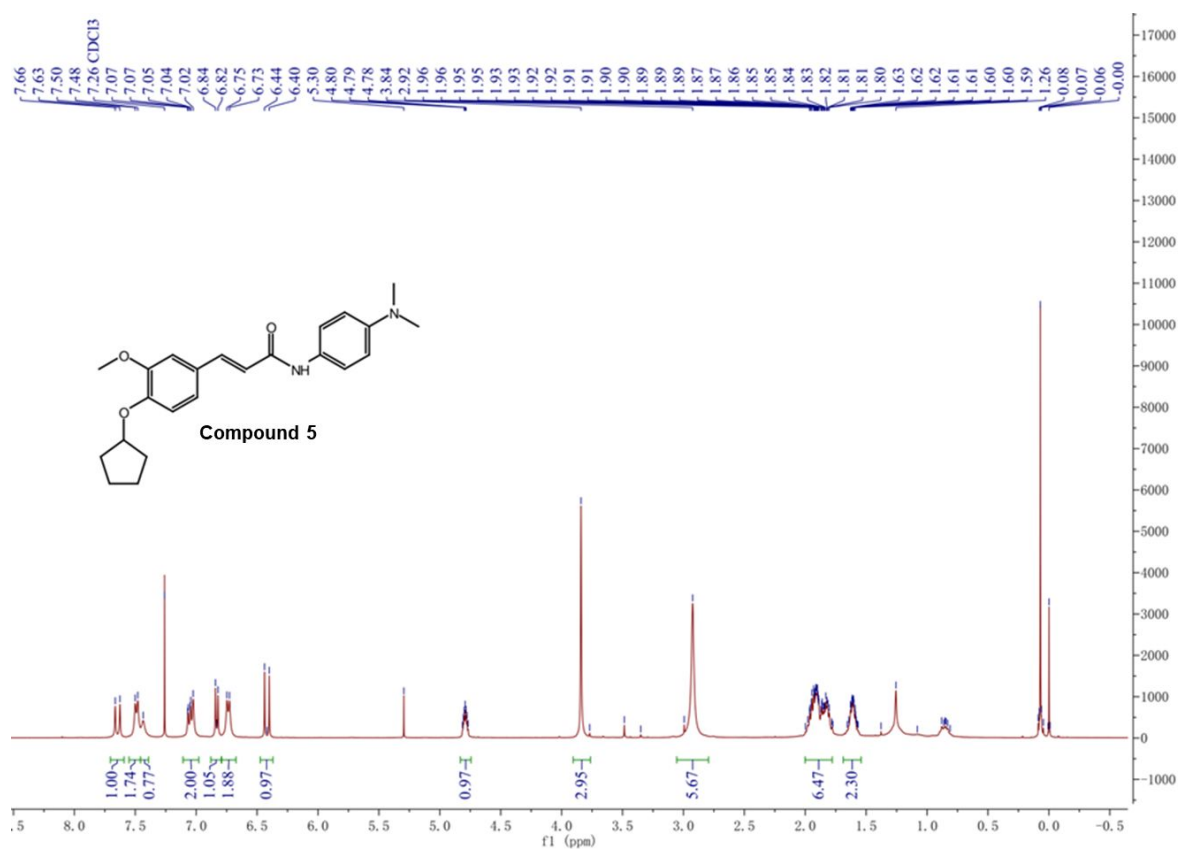

<sup>1</sup>H NMR compound 5

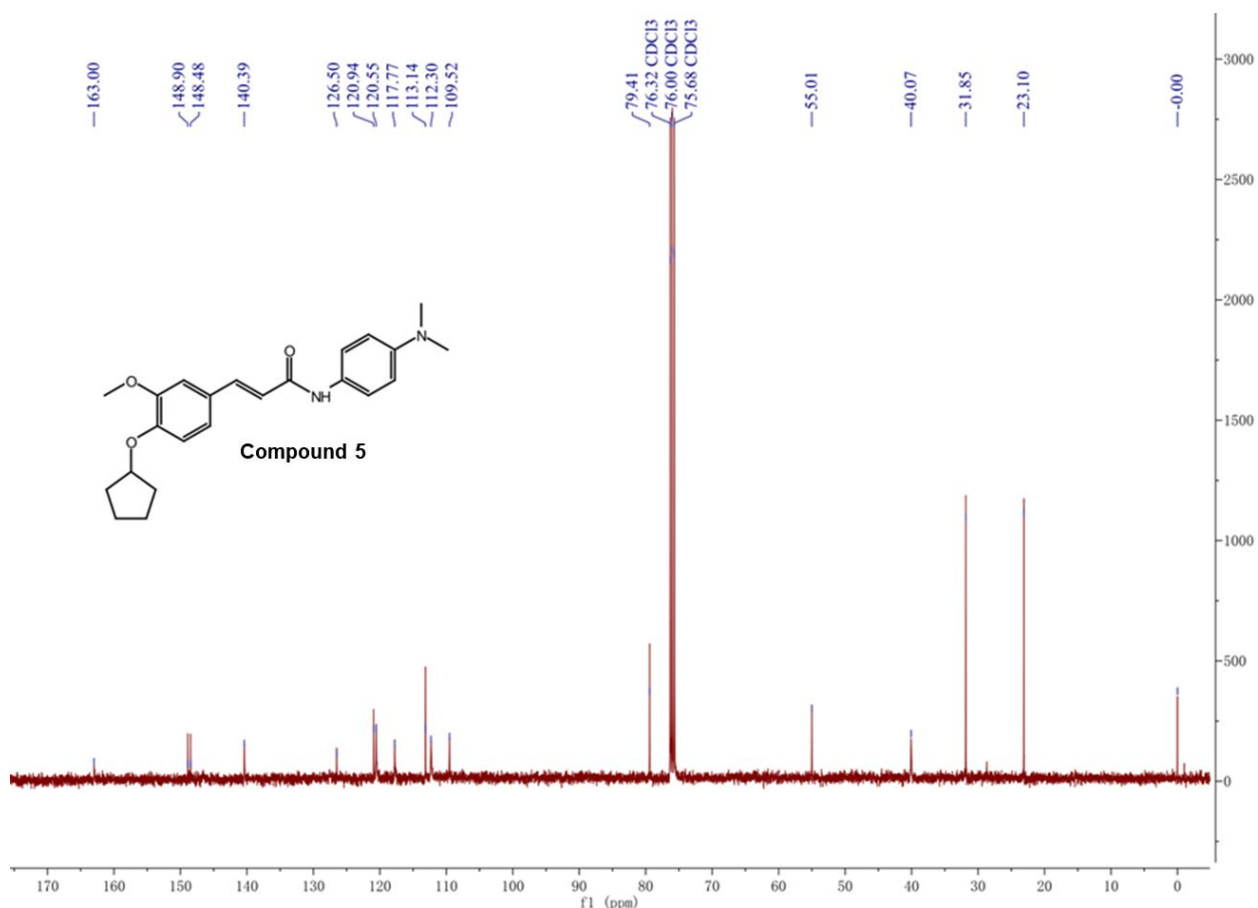

<sup>13</sup>C NMR compound 5

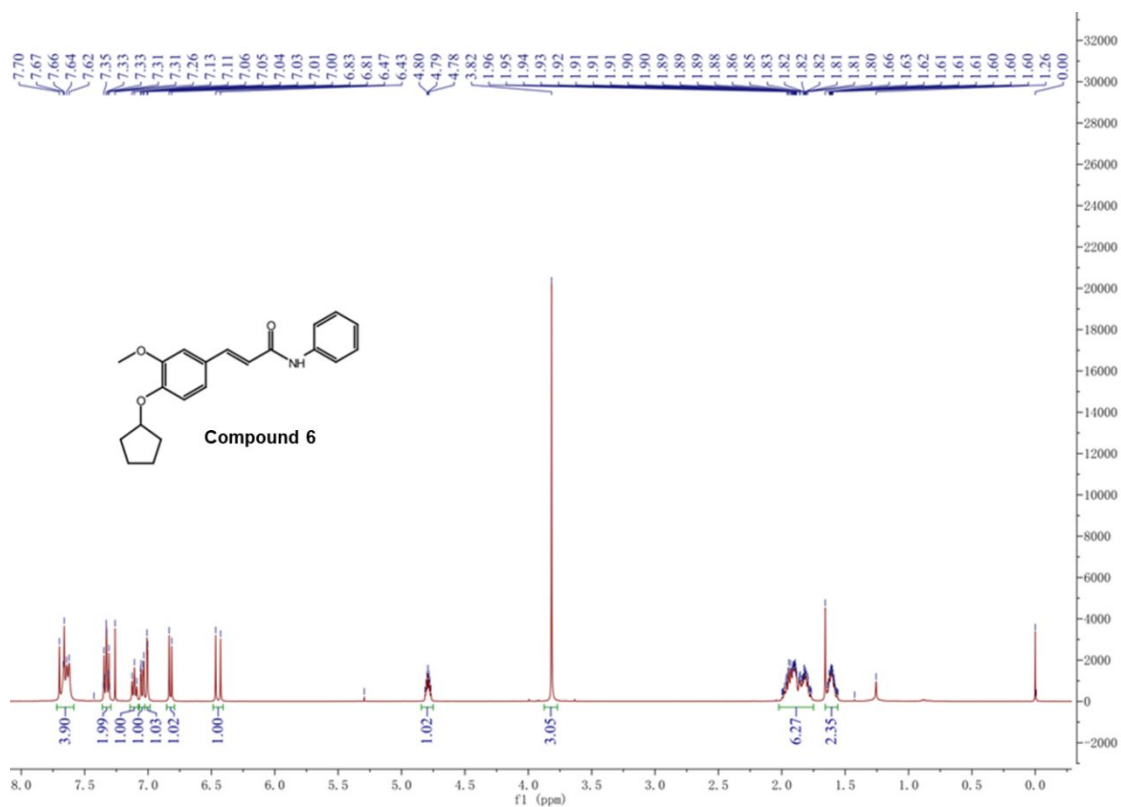

<sup>1</sup>H NMR compound 6

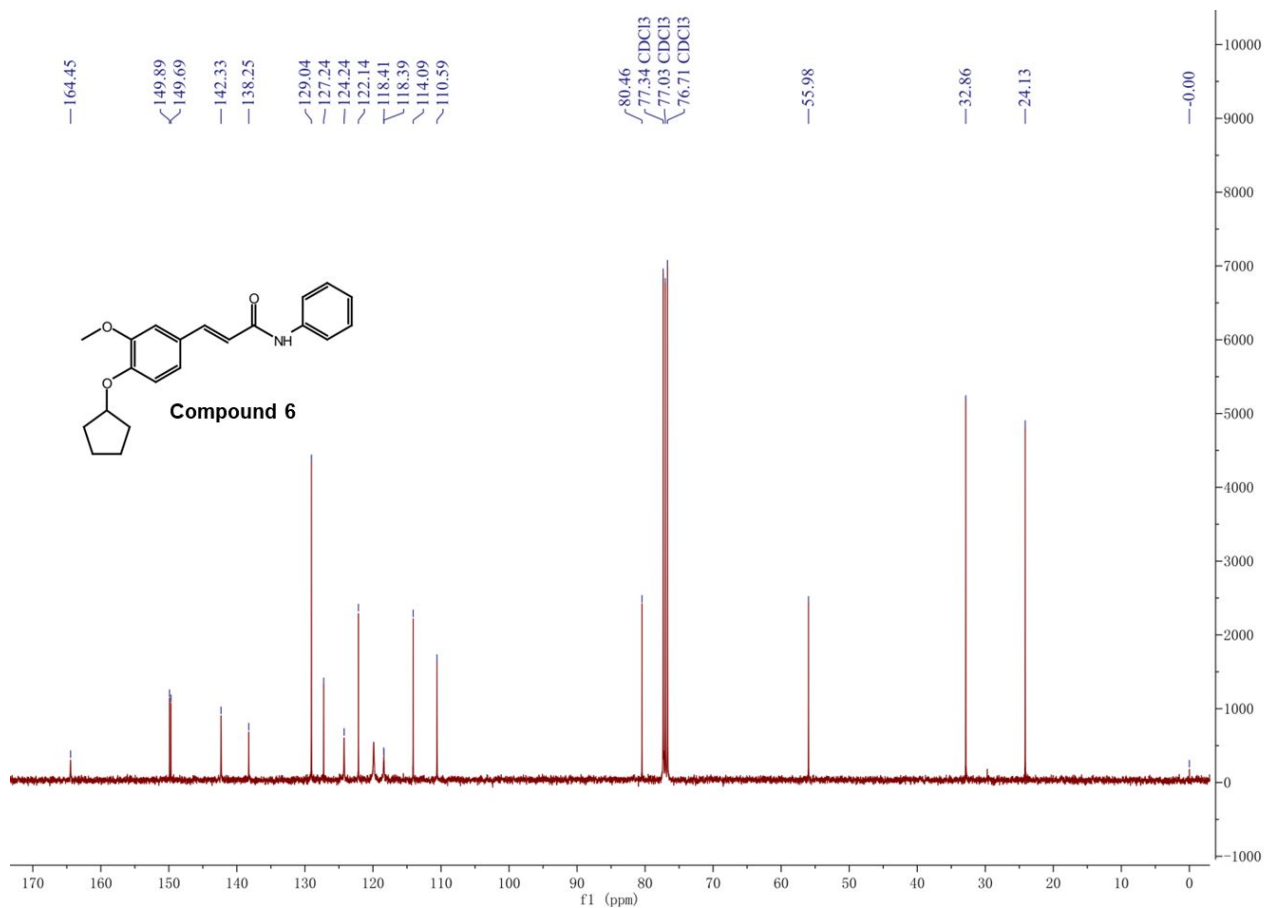

<sup>13</sup>C NMR compound 6

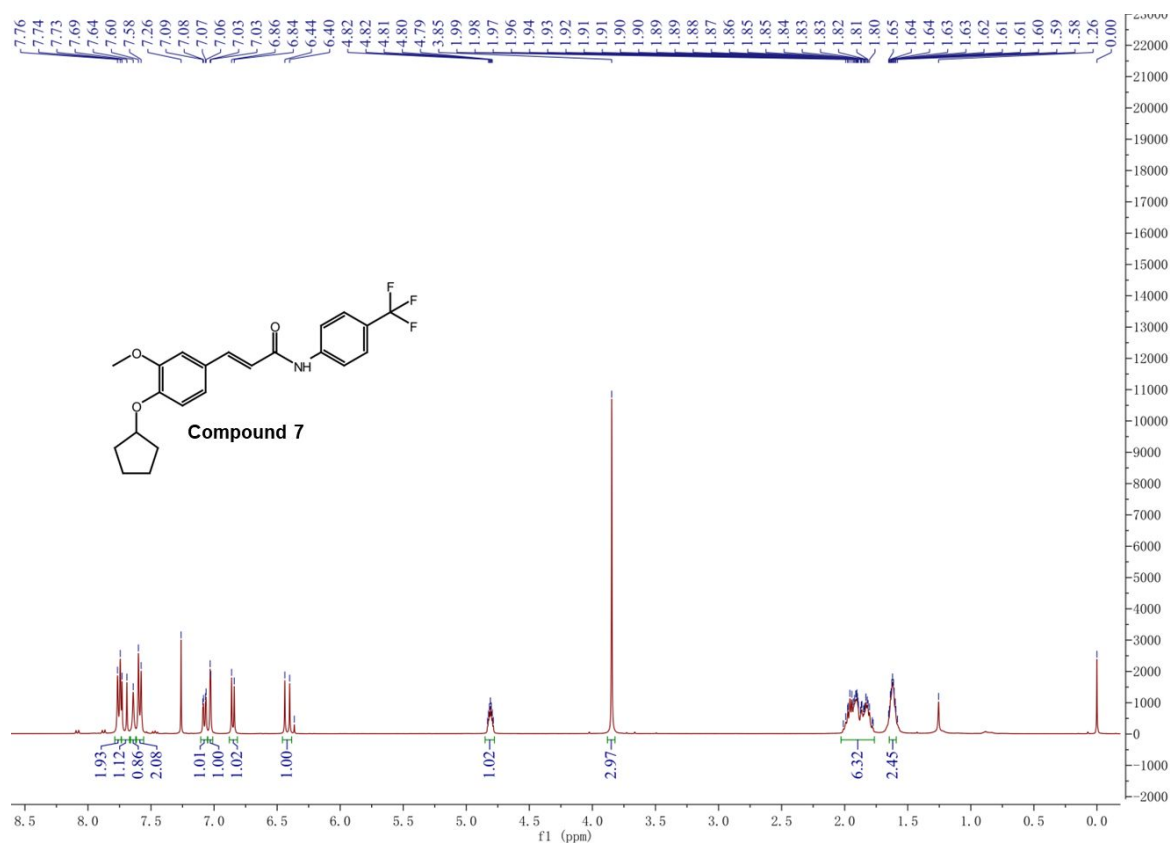

<sup>1</sup>H NMR compound 7

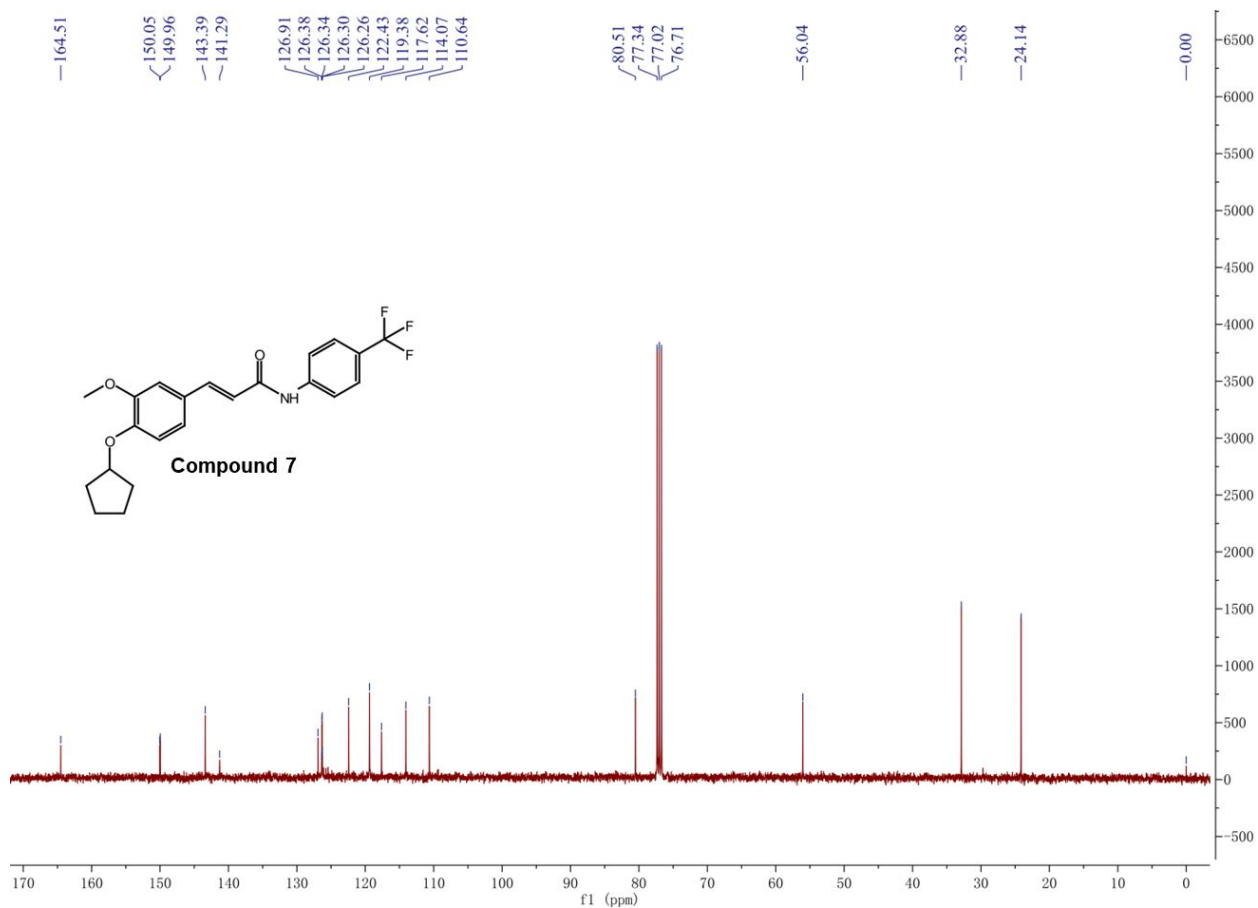

<sup>13</sup>C NMR compound 7

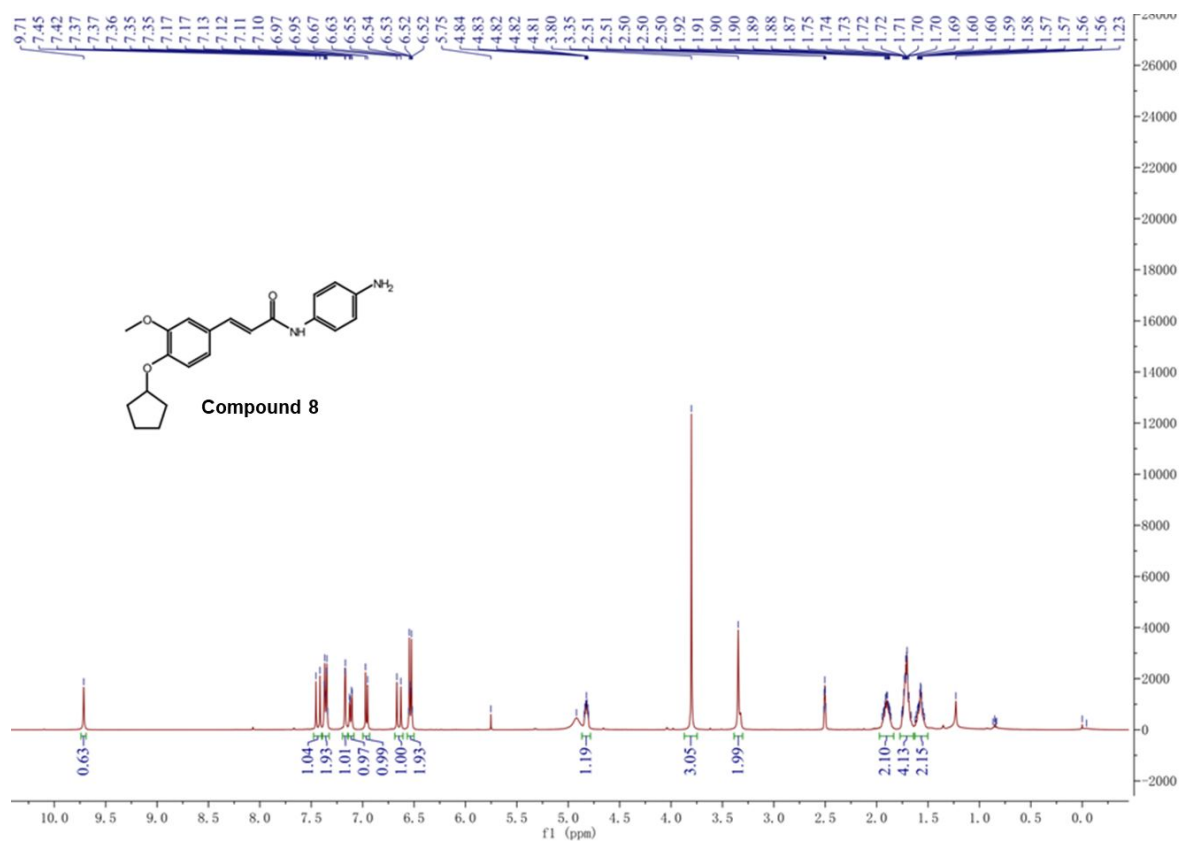

<sup>1</sup>H NMR compound 8

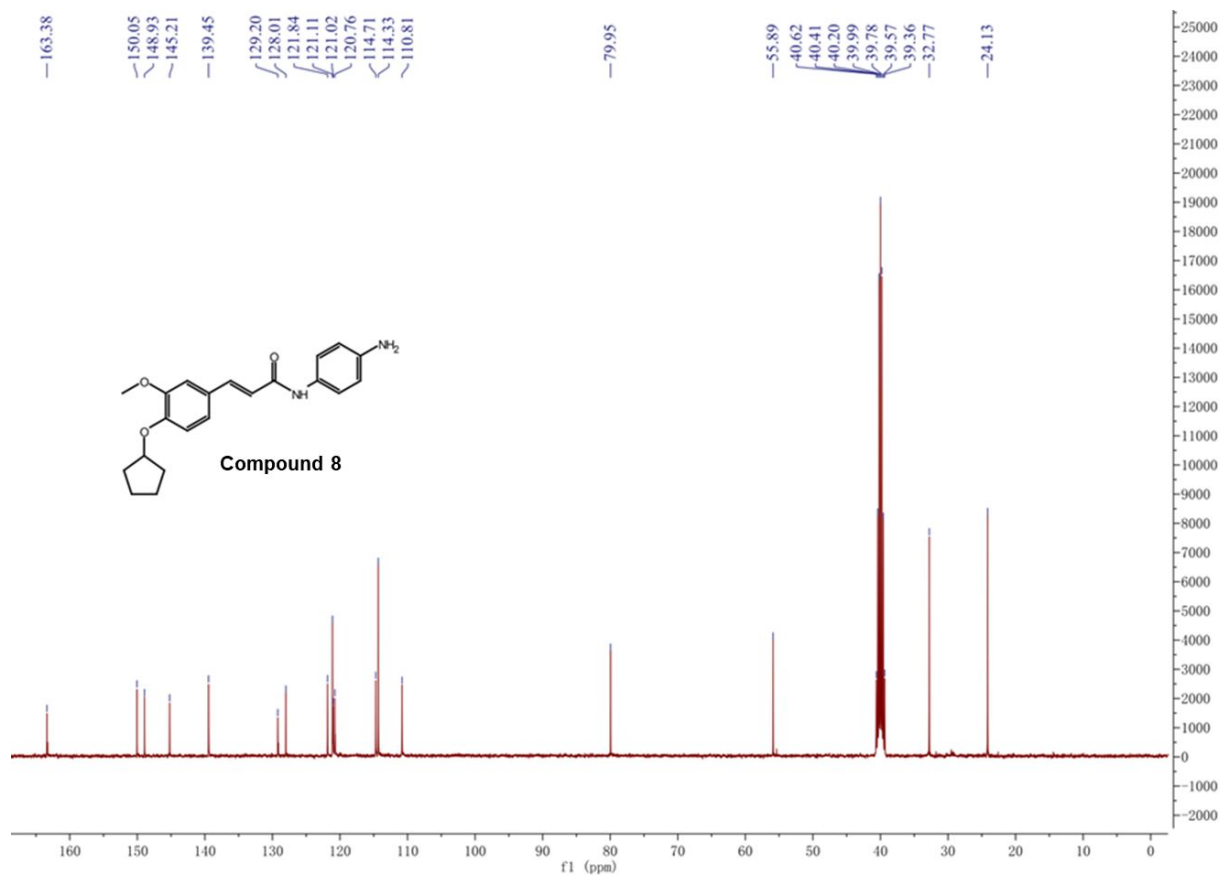

<sup>13</sup>C NMR compound 8

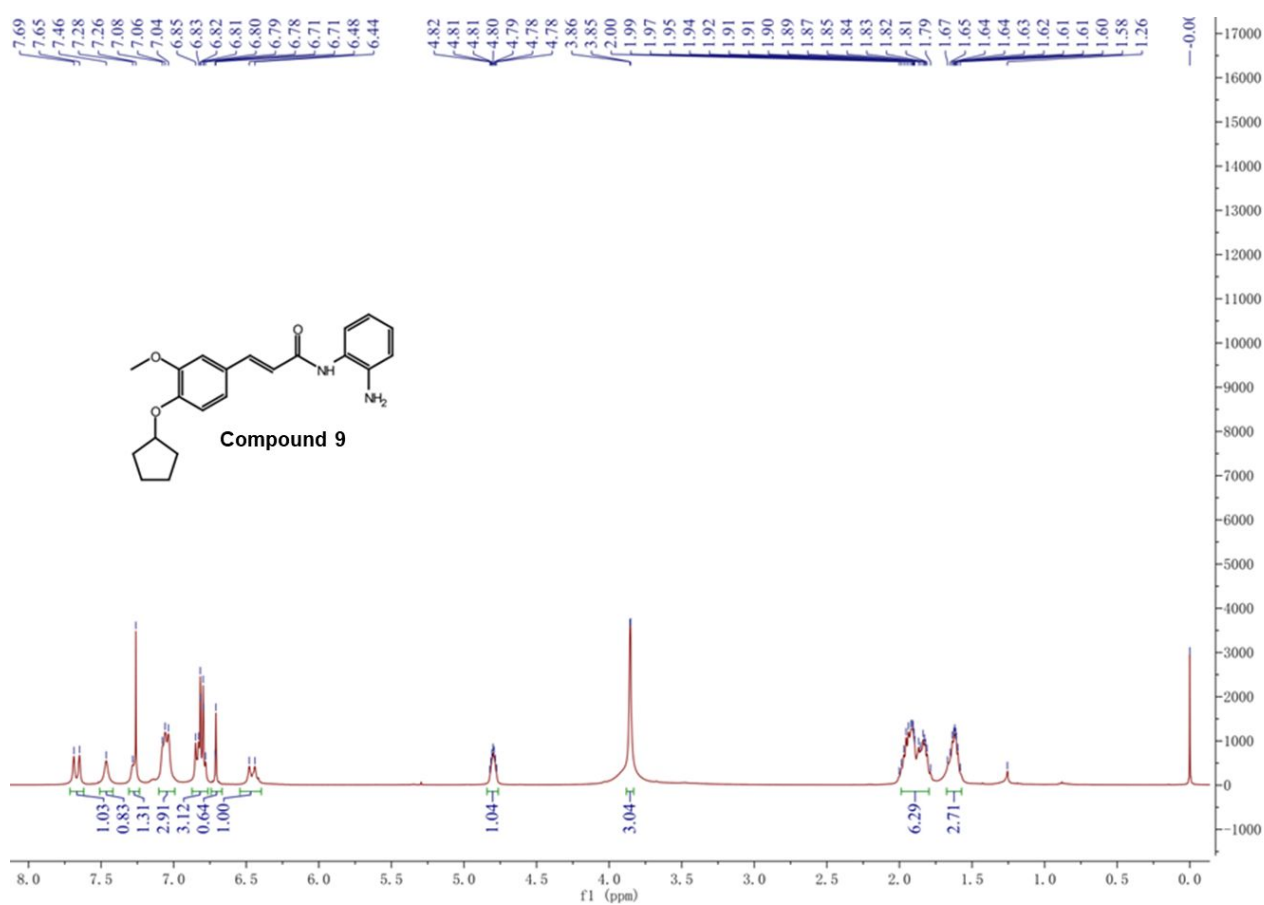

<sup>1</sup>H NMR compound 9



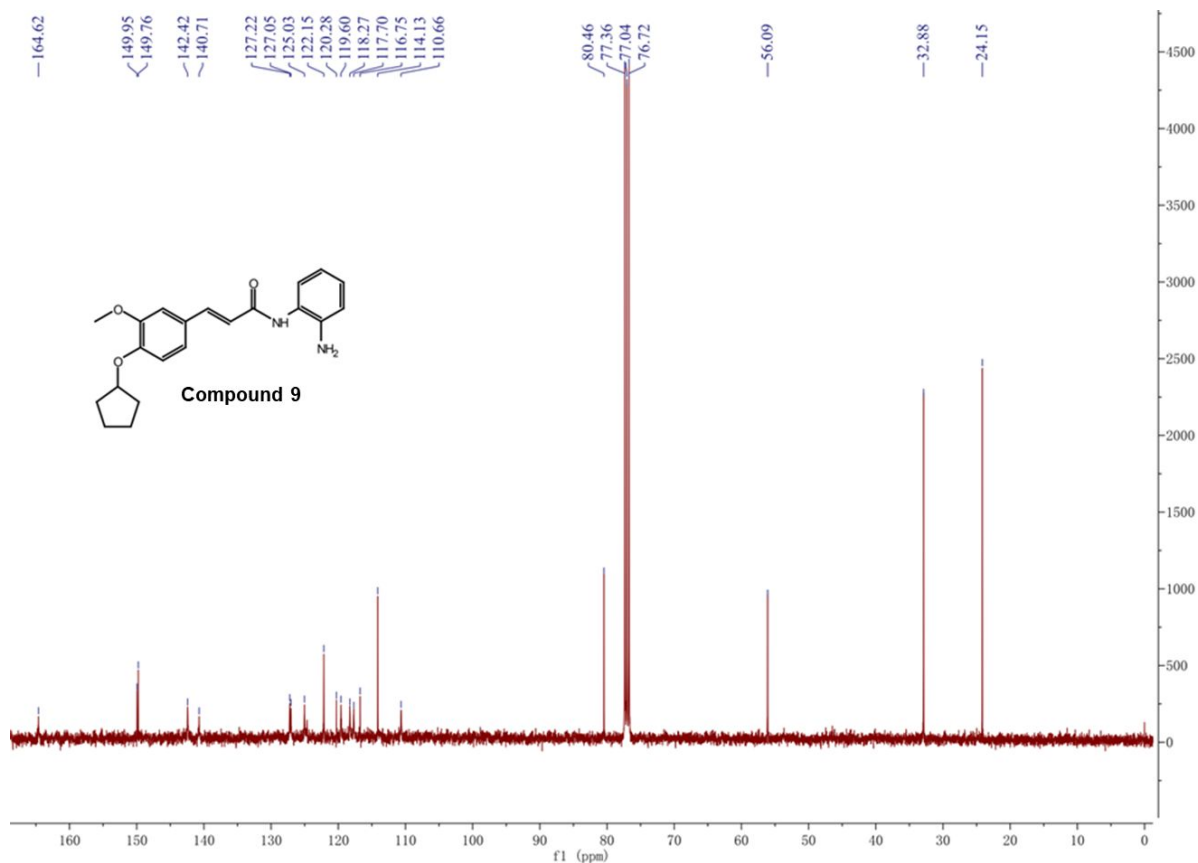

<sup>13</sup>C NMR compound 9

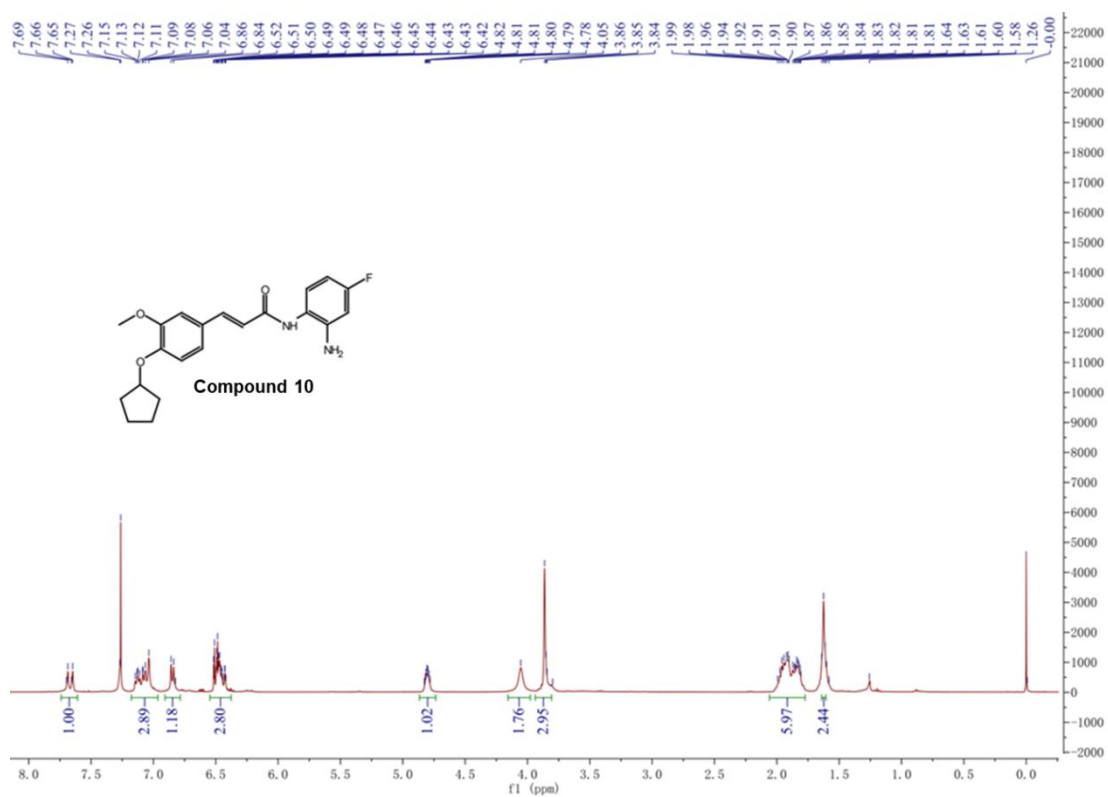

<sup>1</sup>H NMR compound 10

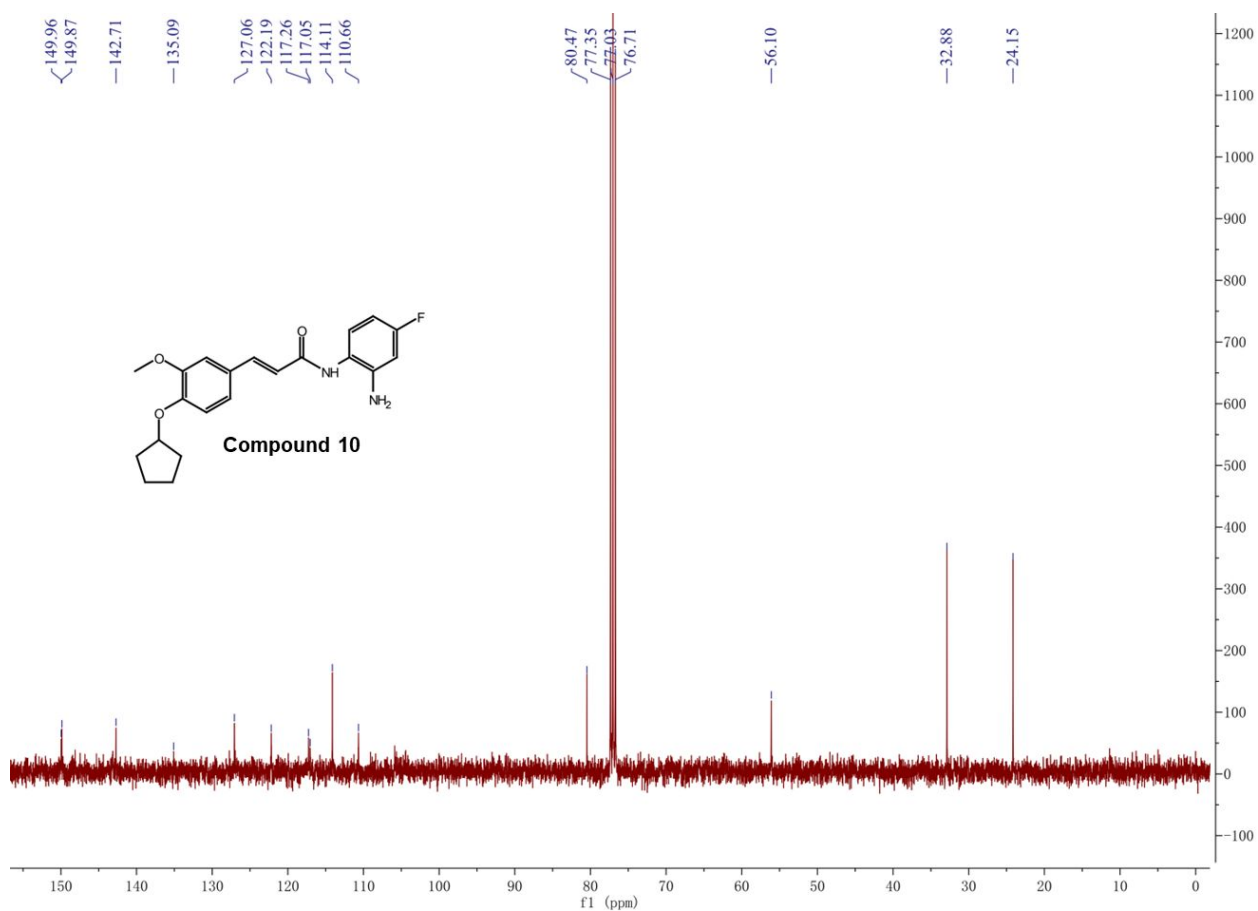

<sup>13</sup>C NMR compound 10

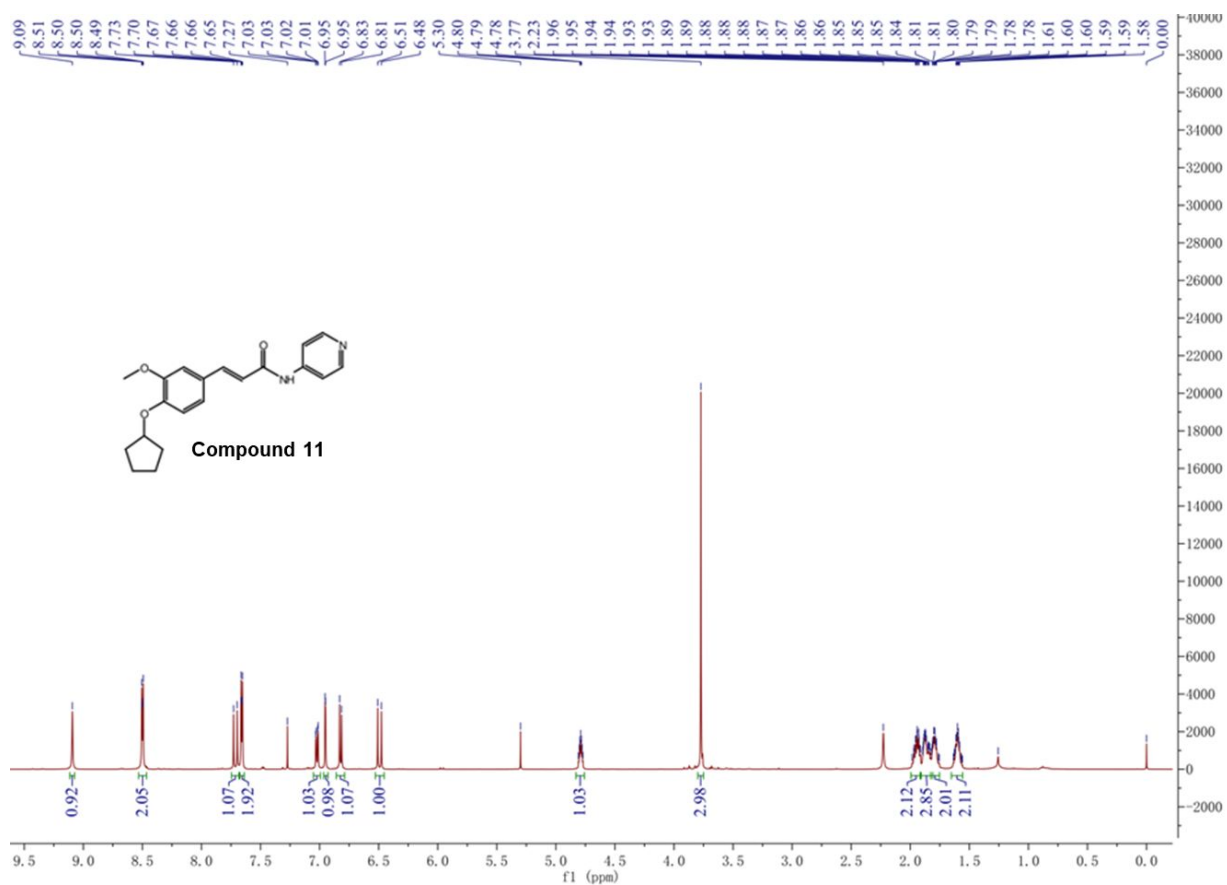

<sup>1</sup>H NMR compound 11

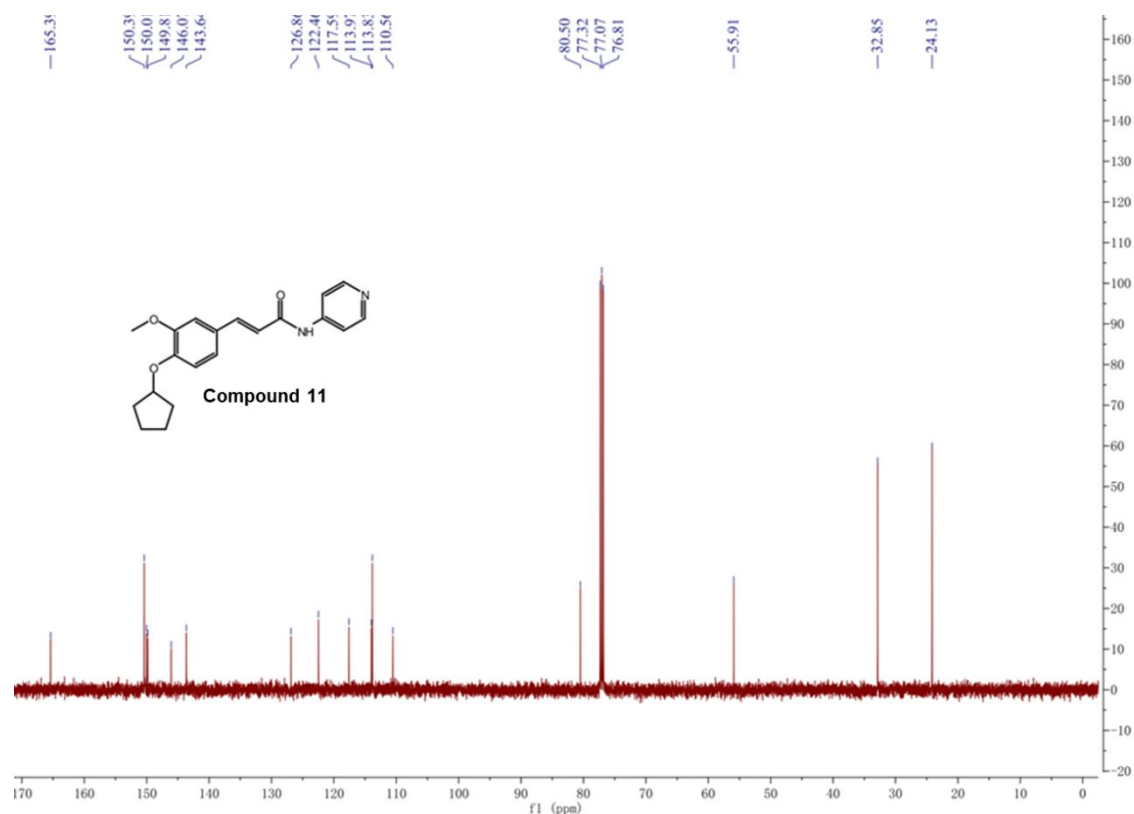

$^{13}\text{C}$  NMR compound 11

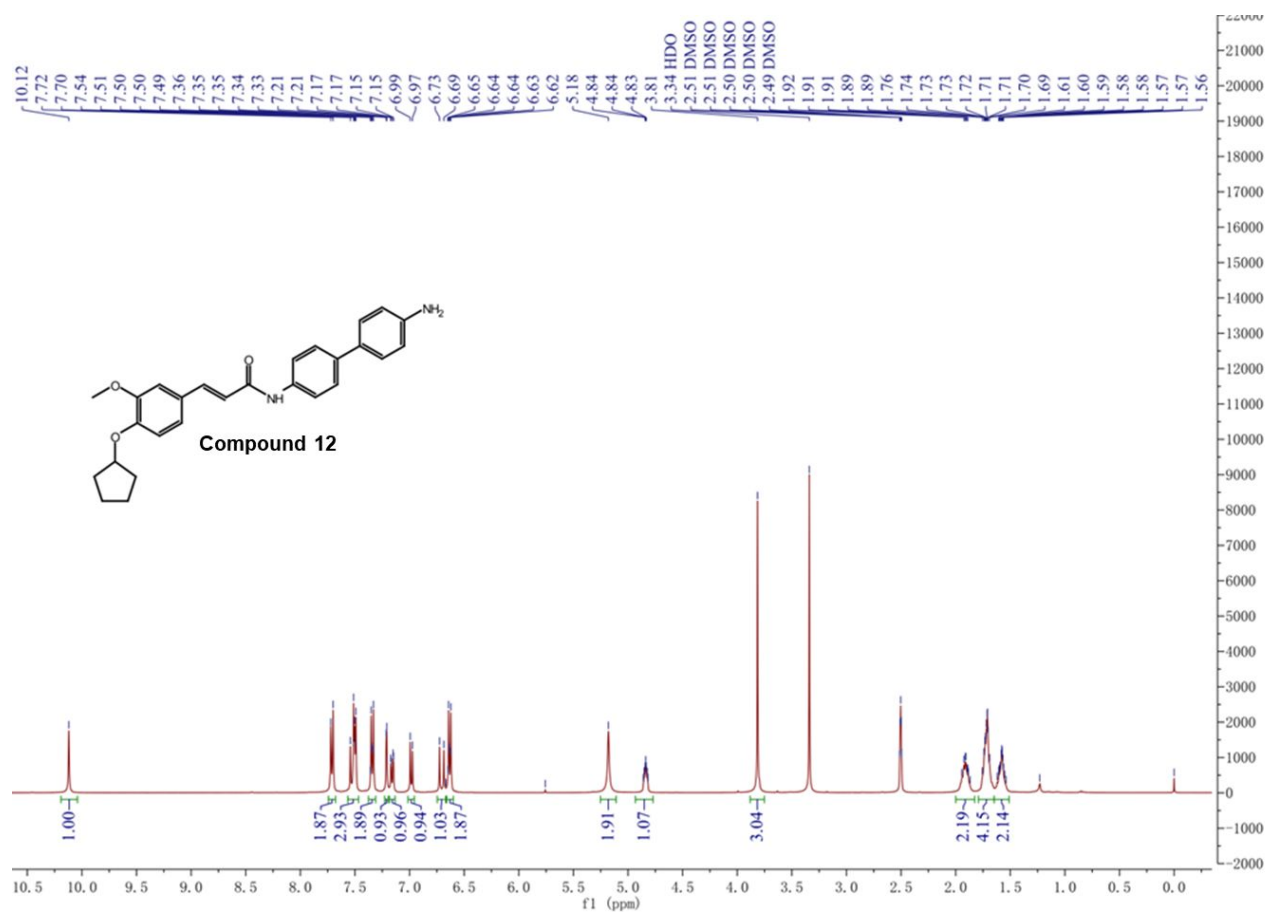

$^1\text{H}$  NMR compound 12

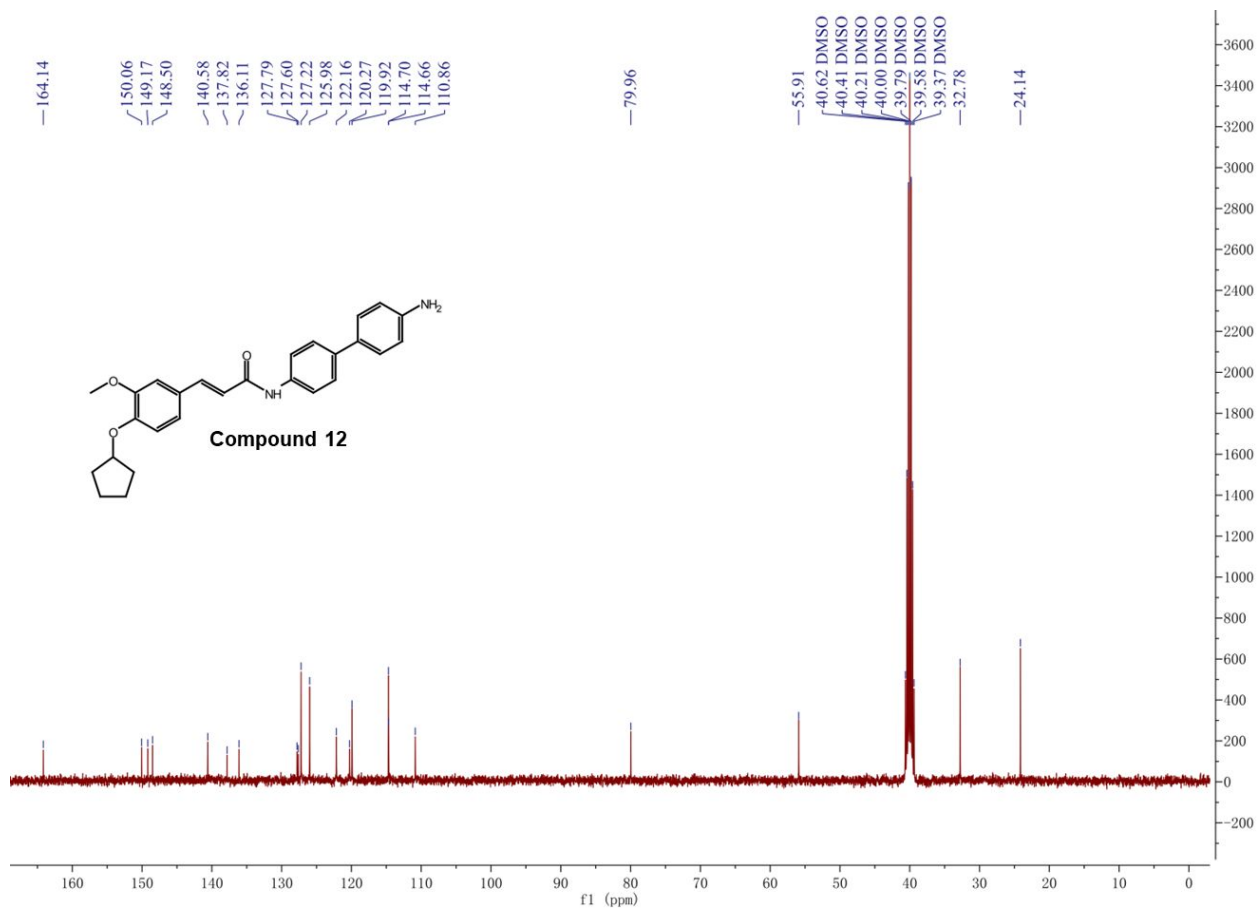

<sup>13</sup>C NMR compound 12

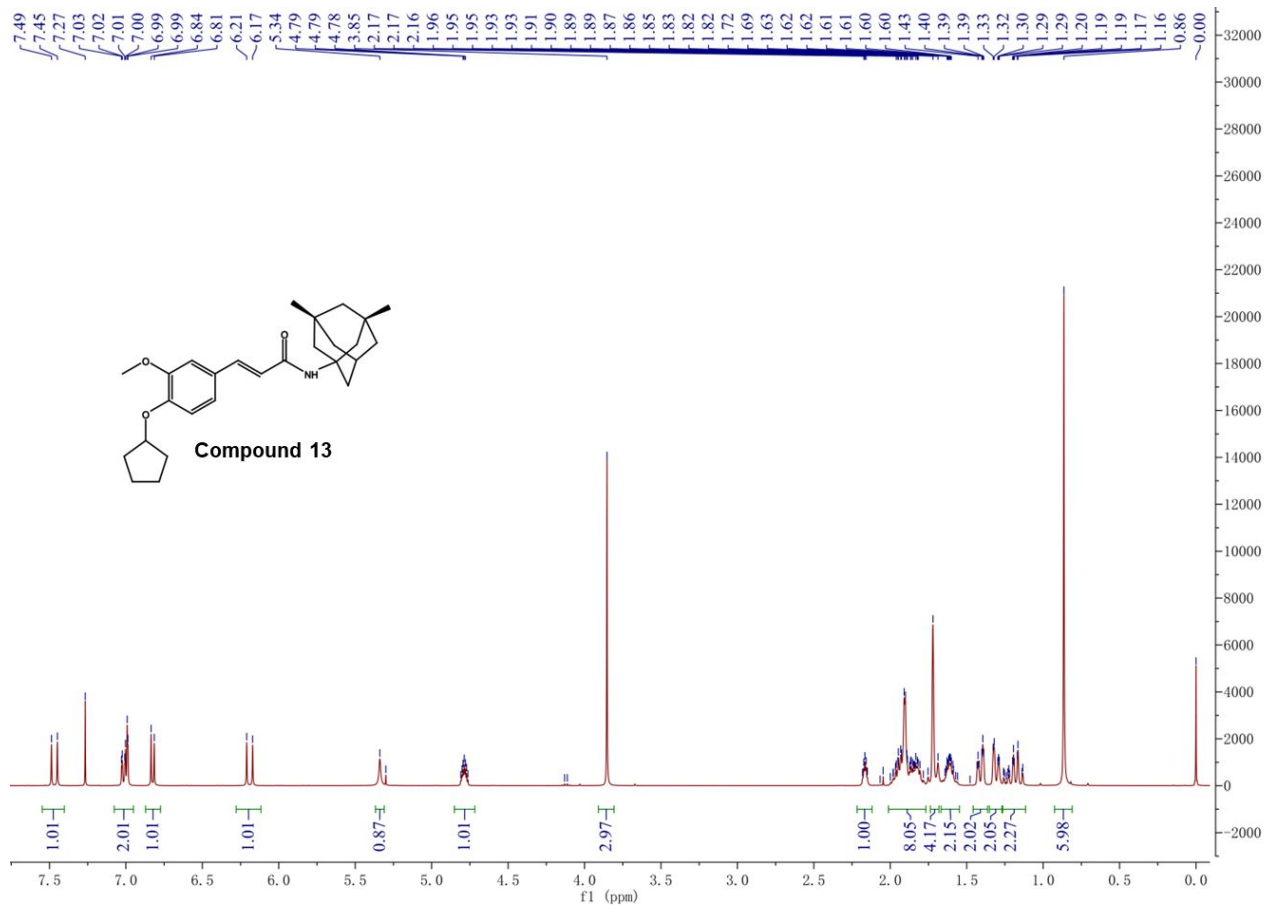

<sup>1</sup>H NMR compound 13

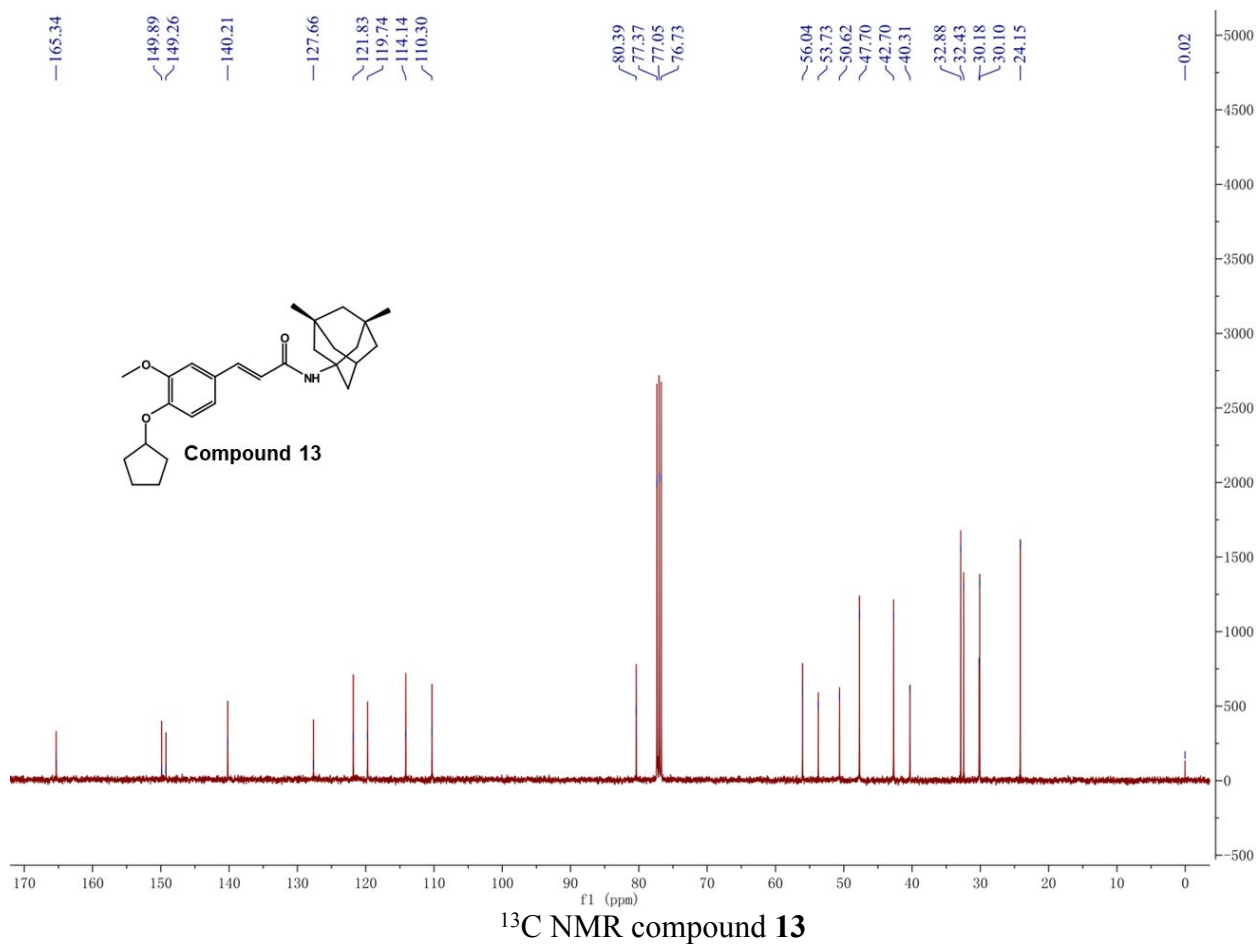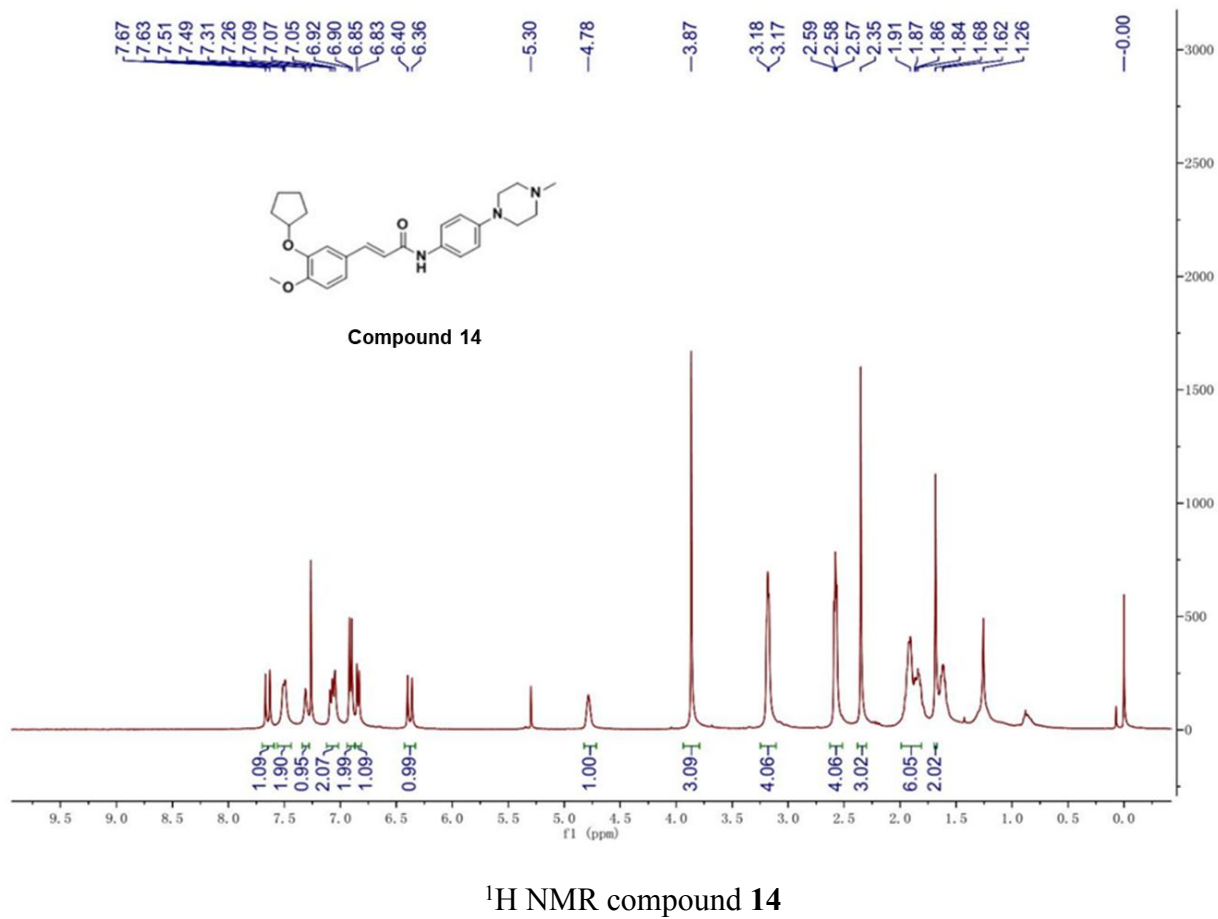

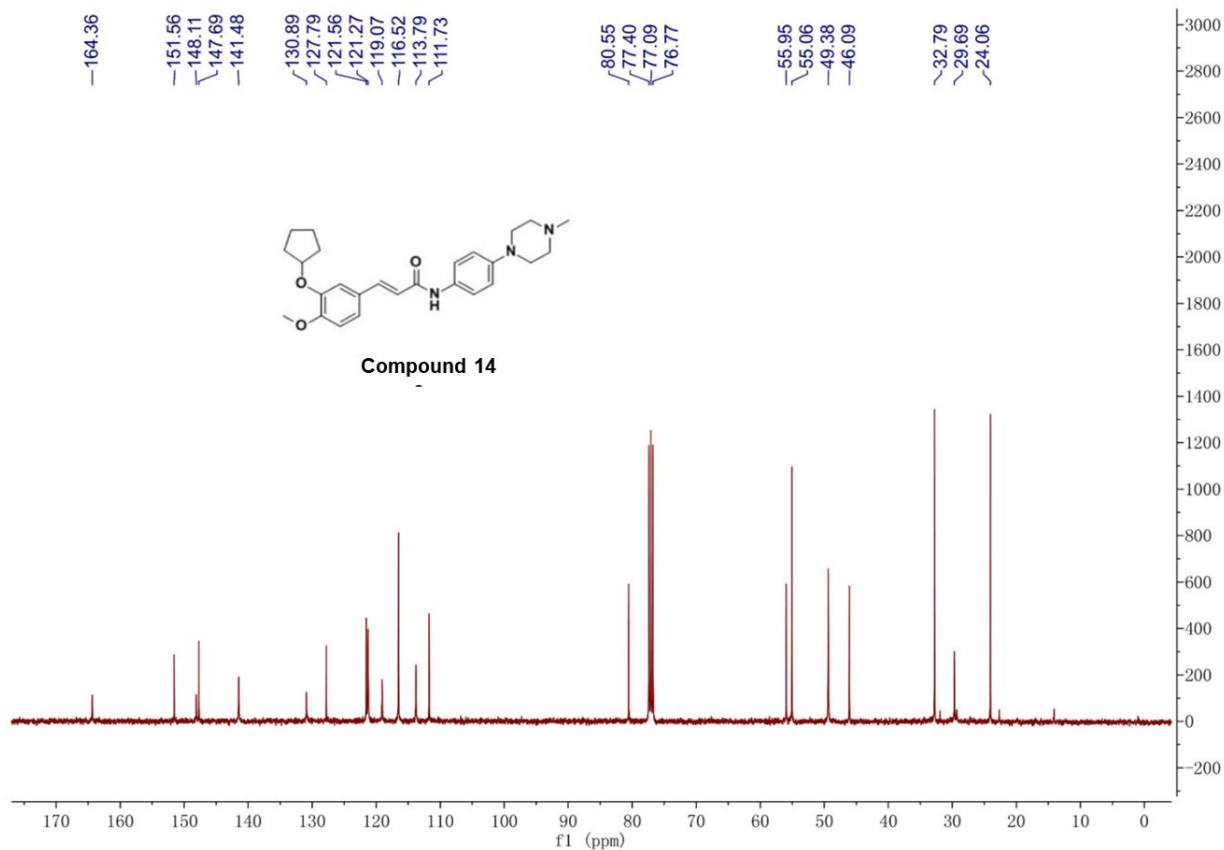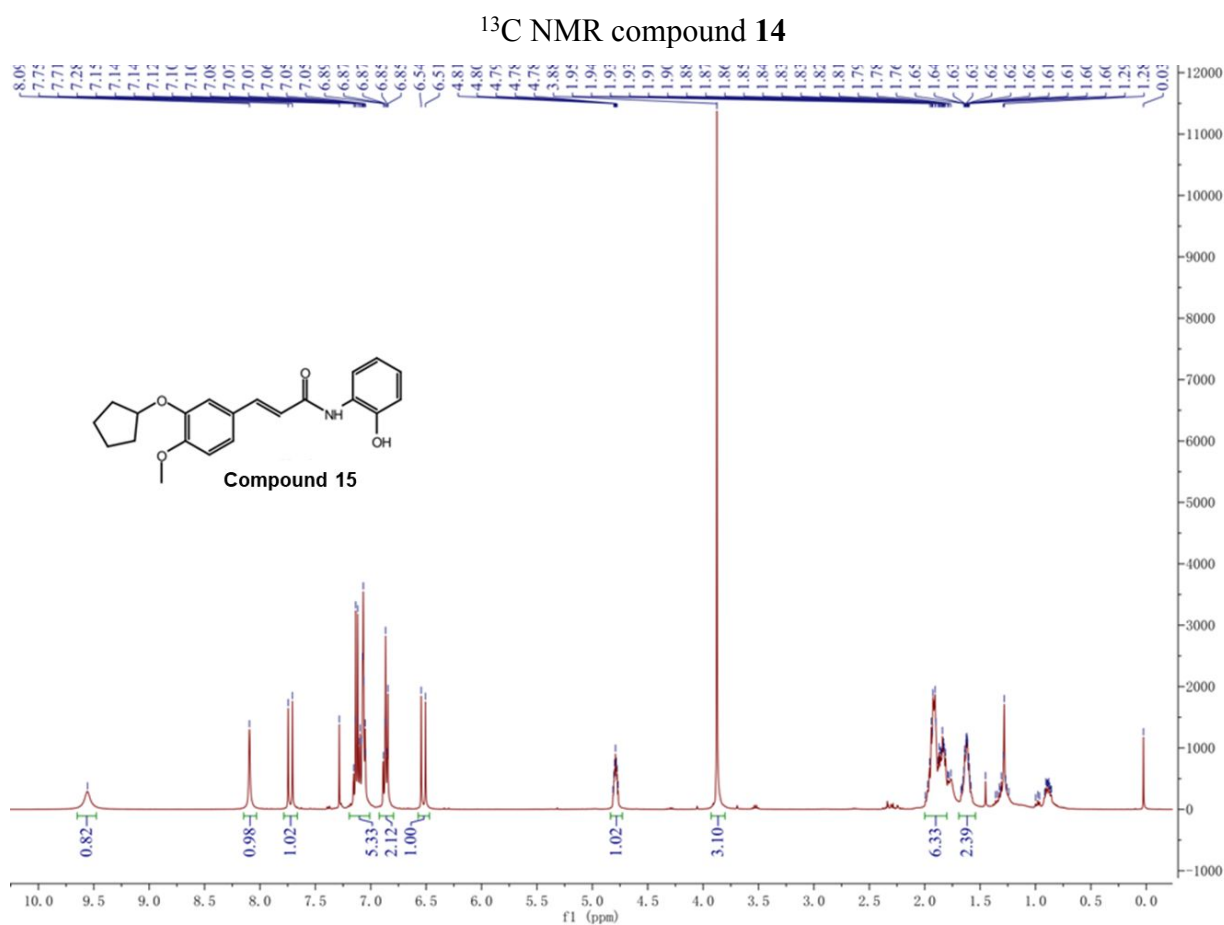

<sup>1</sup>H NMR compound 15

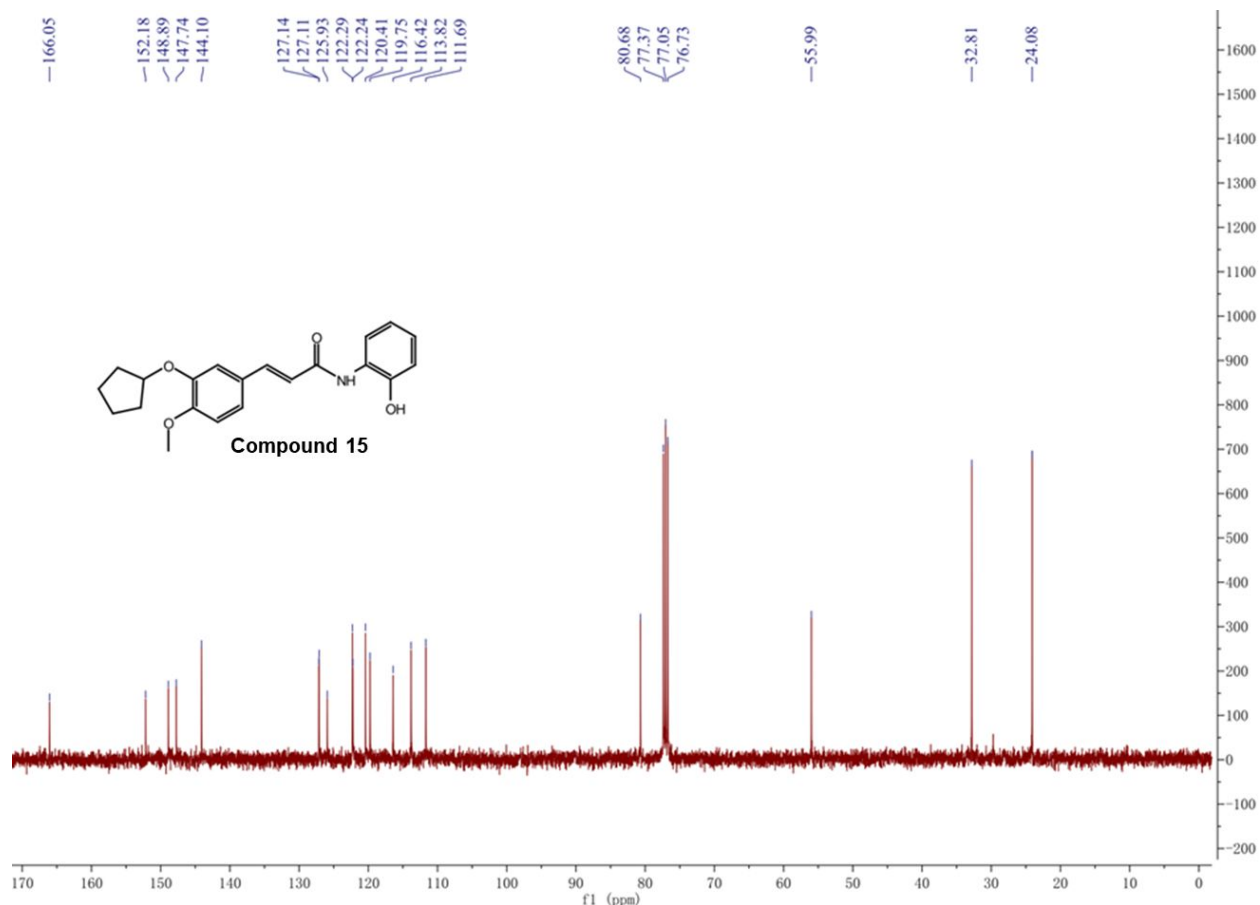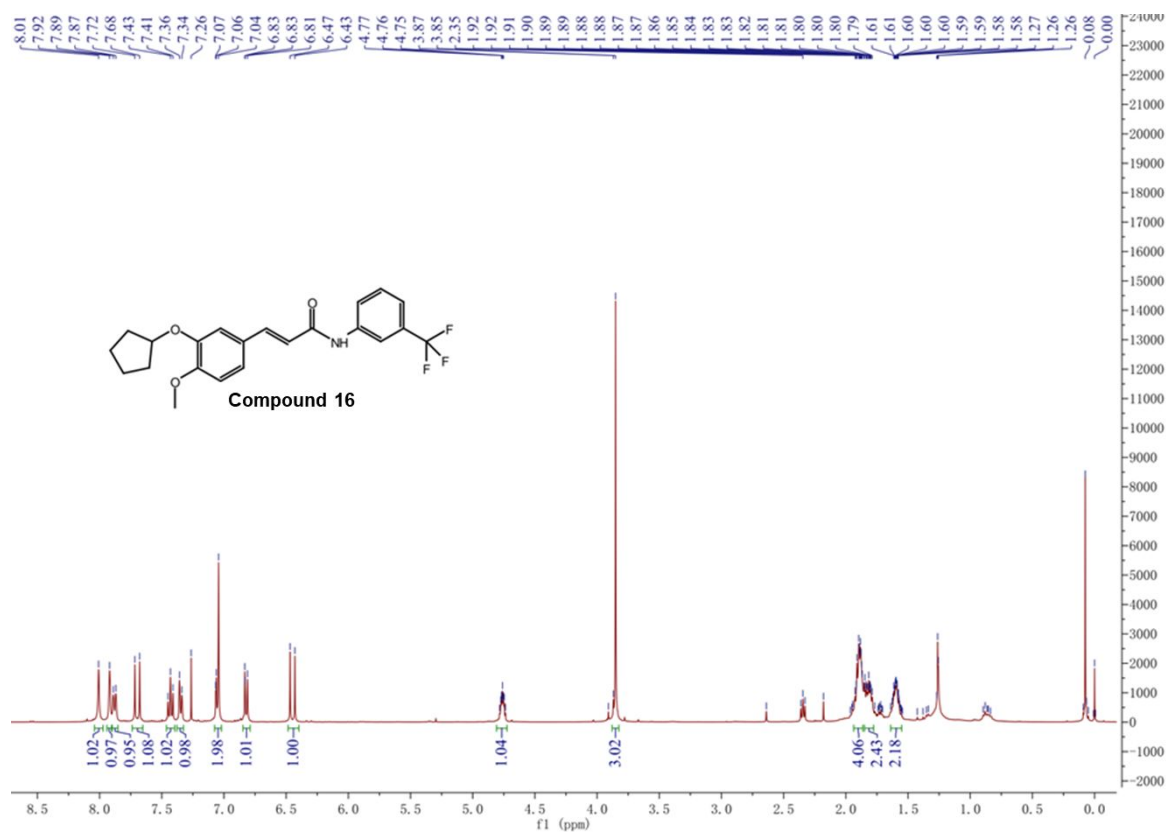



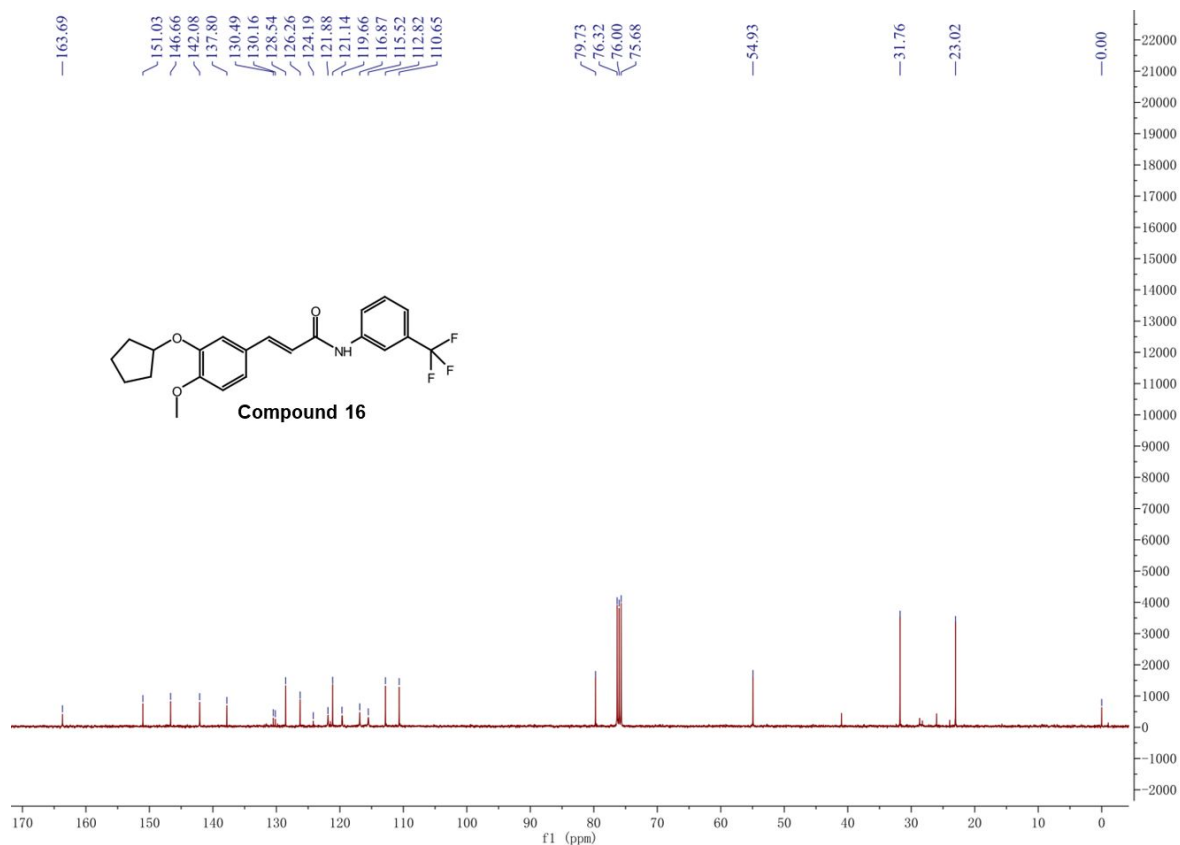

<sup>13</sup>C NMR compound 16

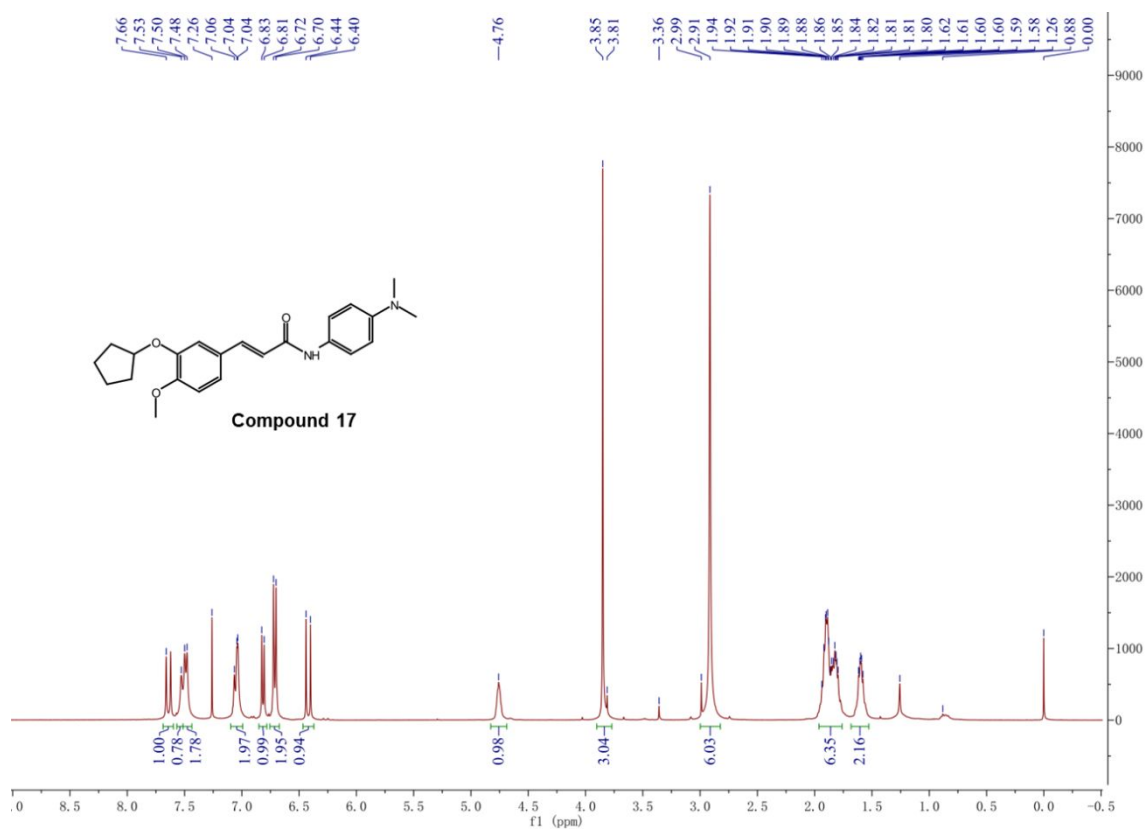

<sup>1</sup>H NMR compound 17



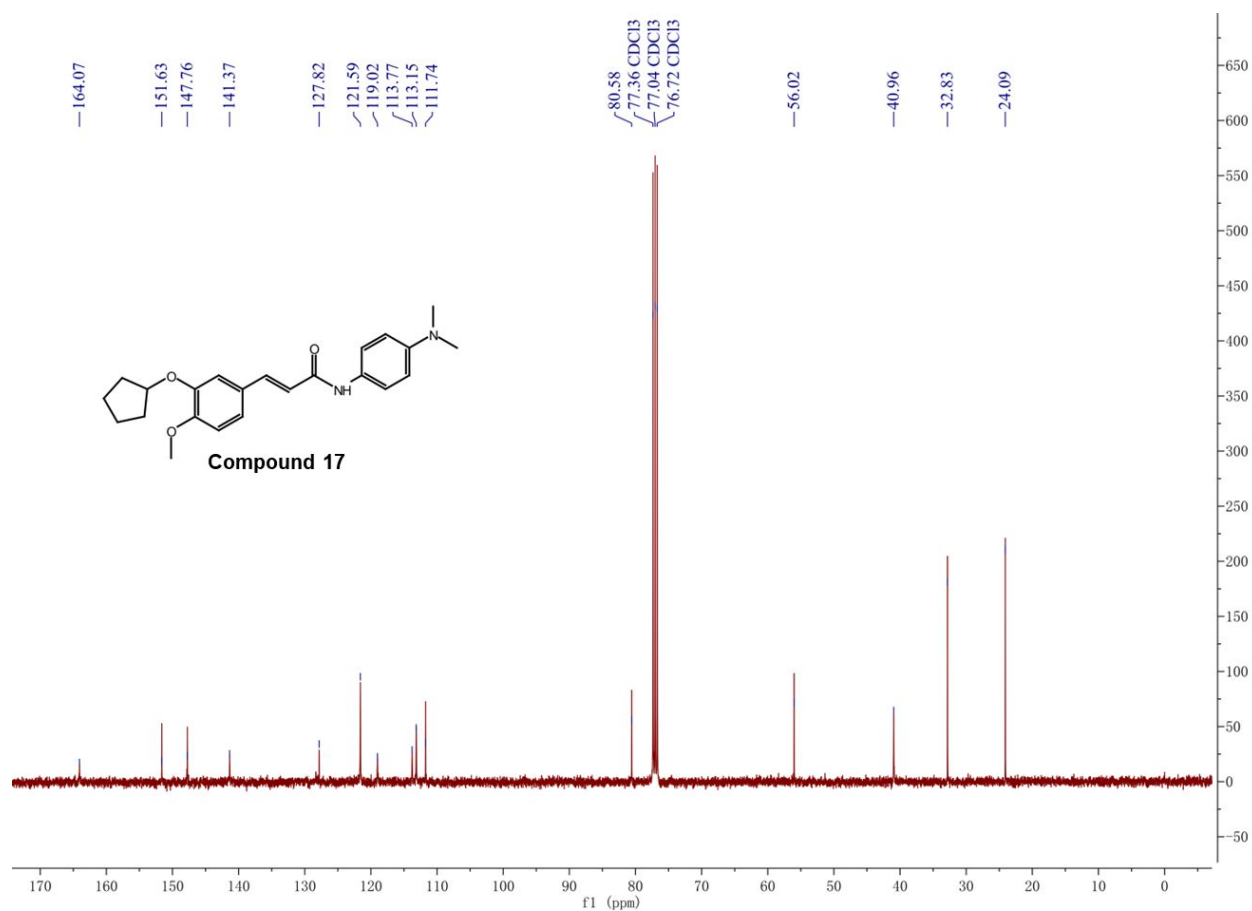

<sup>13</sup>C NMR compound 17

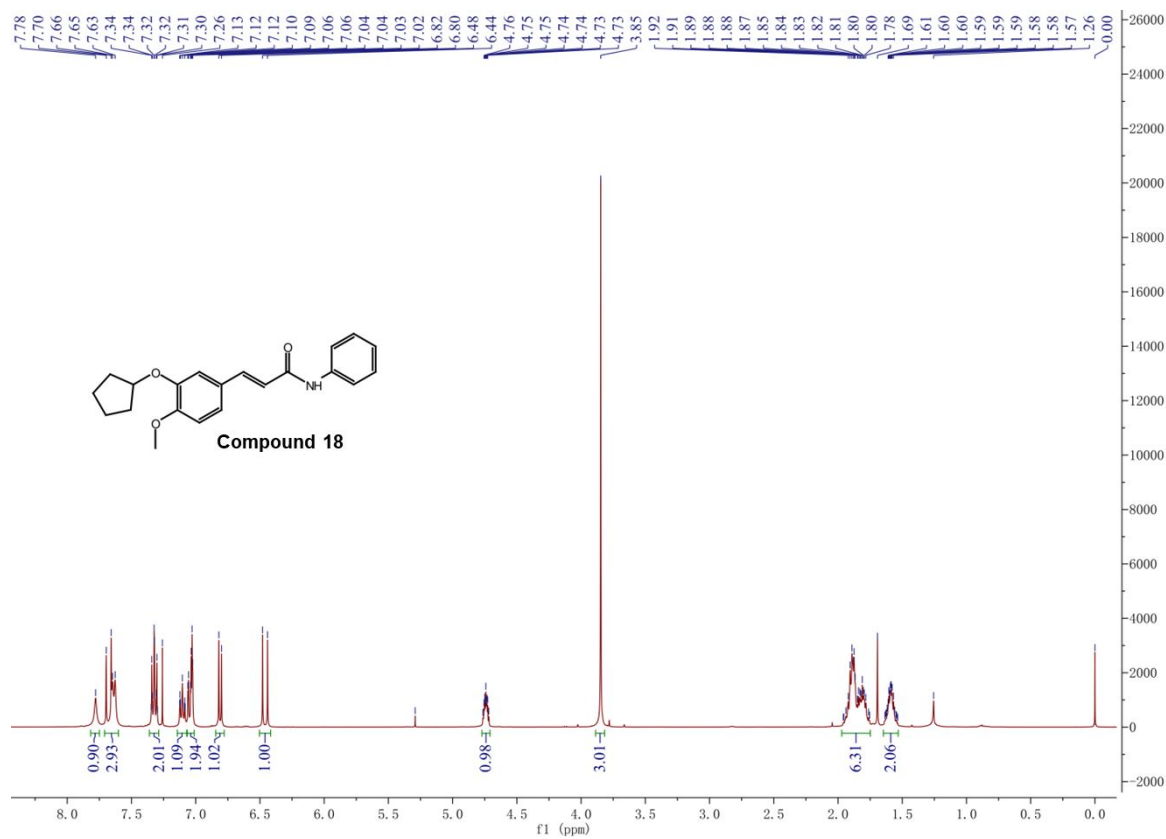

<sup>1</sup>H NMR compound 18

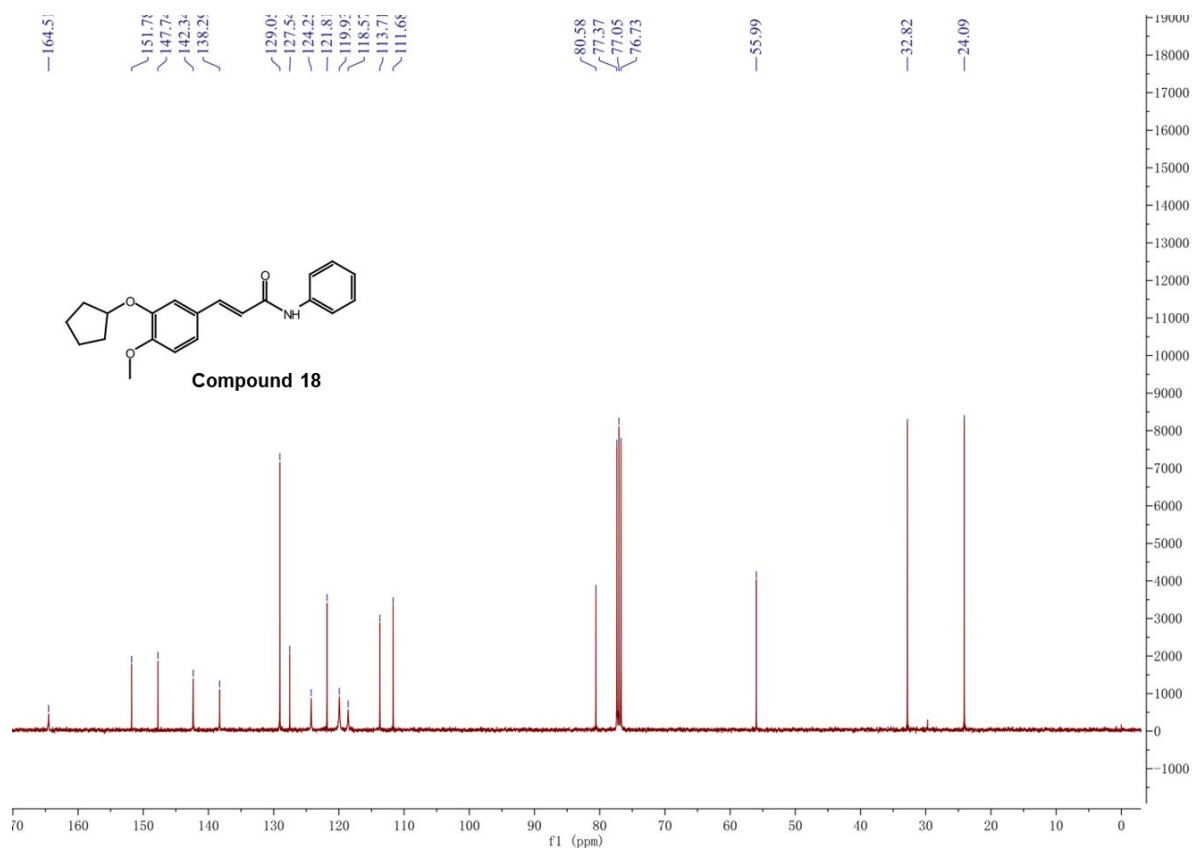

$^{13}\text{C}$  NMR compound **18**

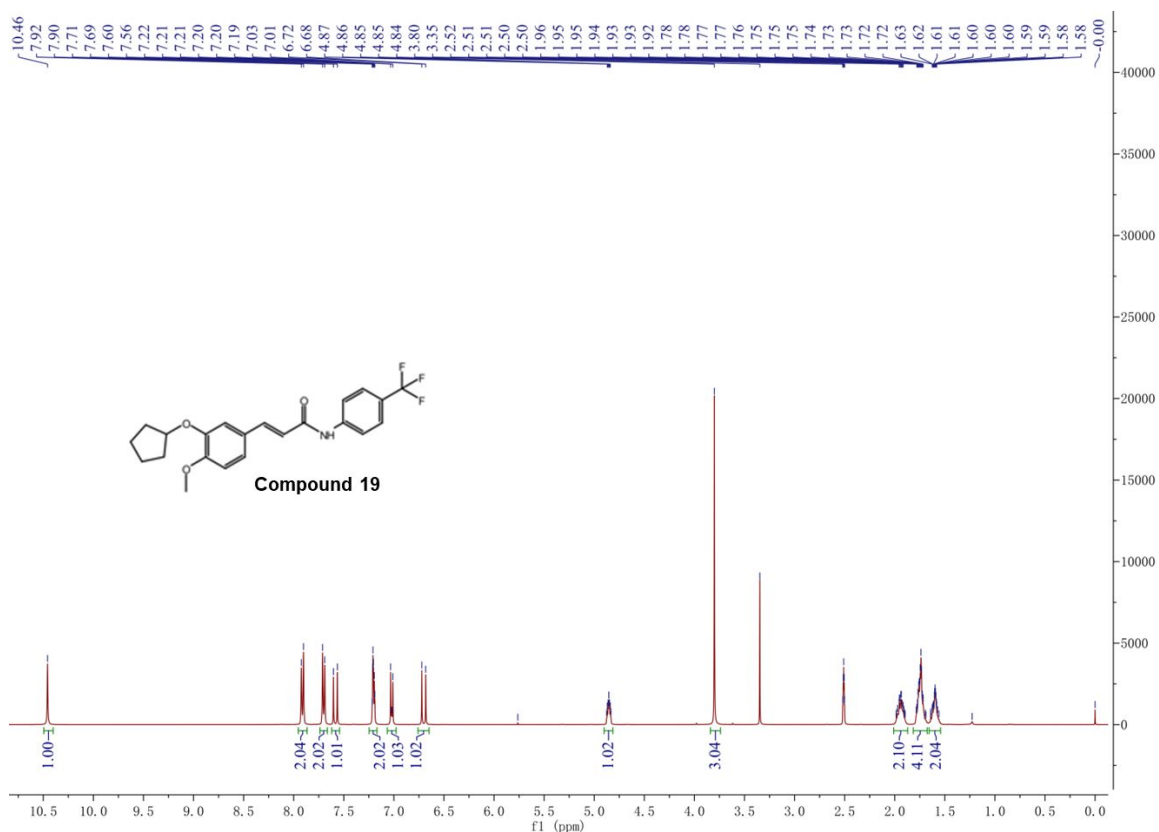

$^1\text{H}$  NMR compound **19**

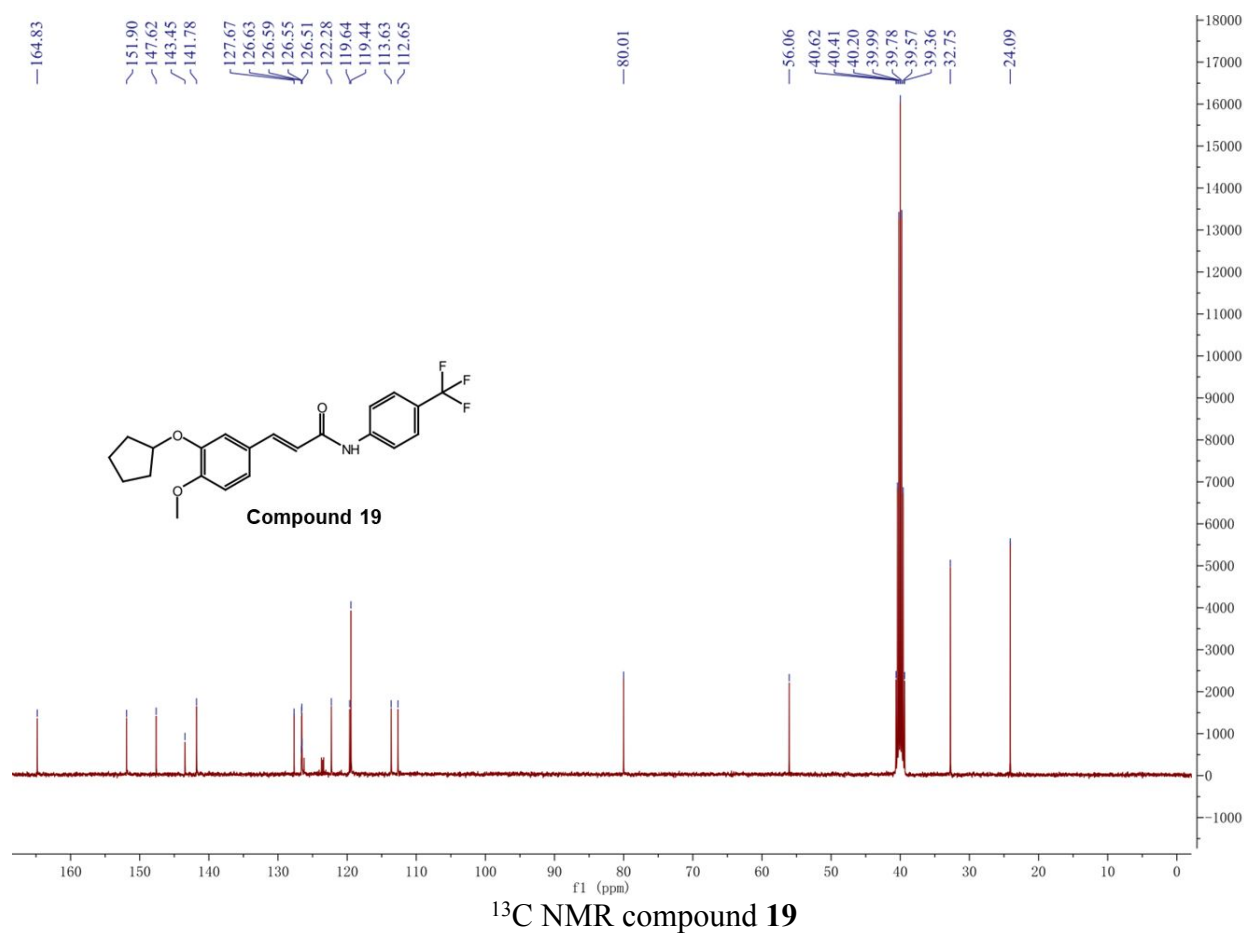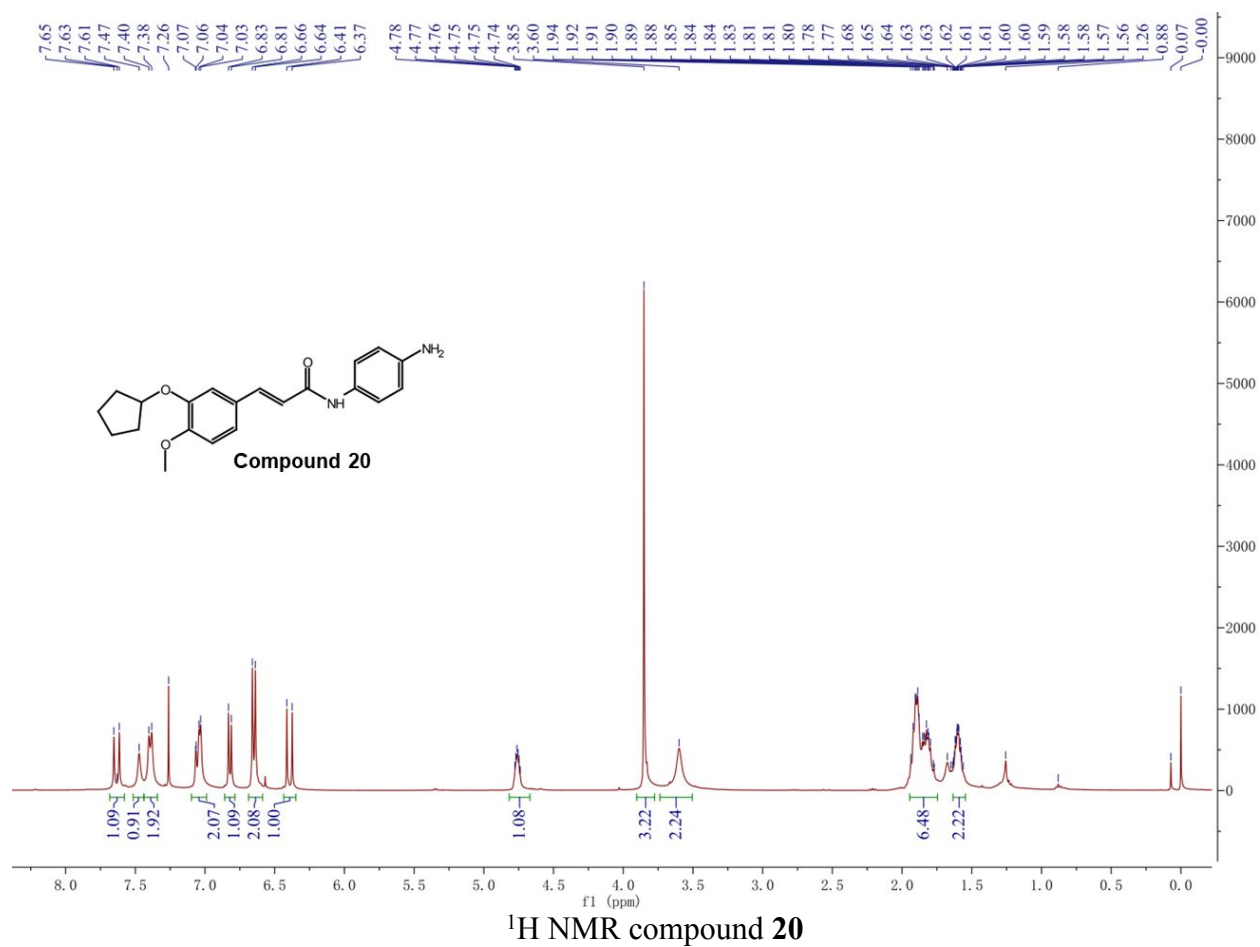

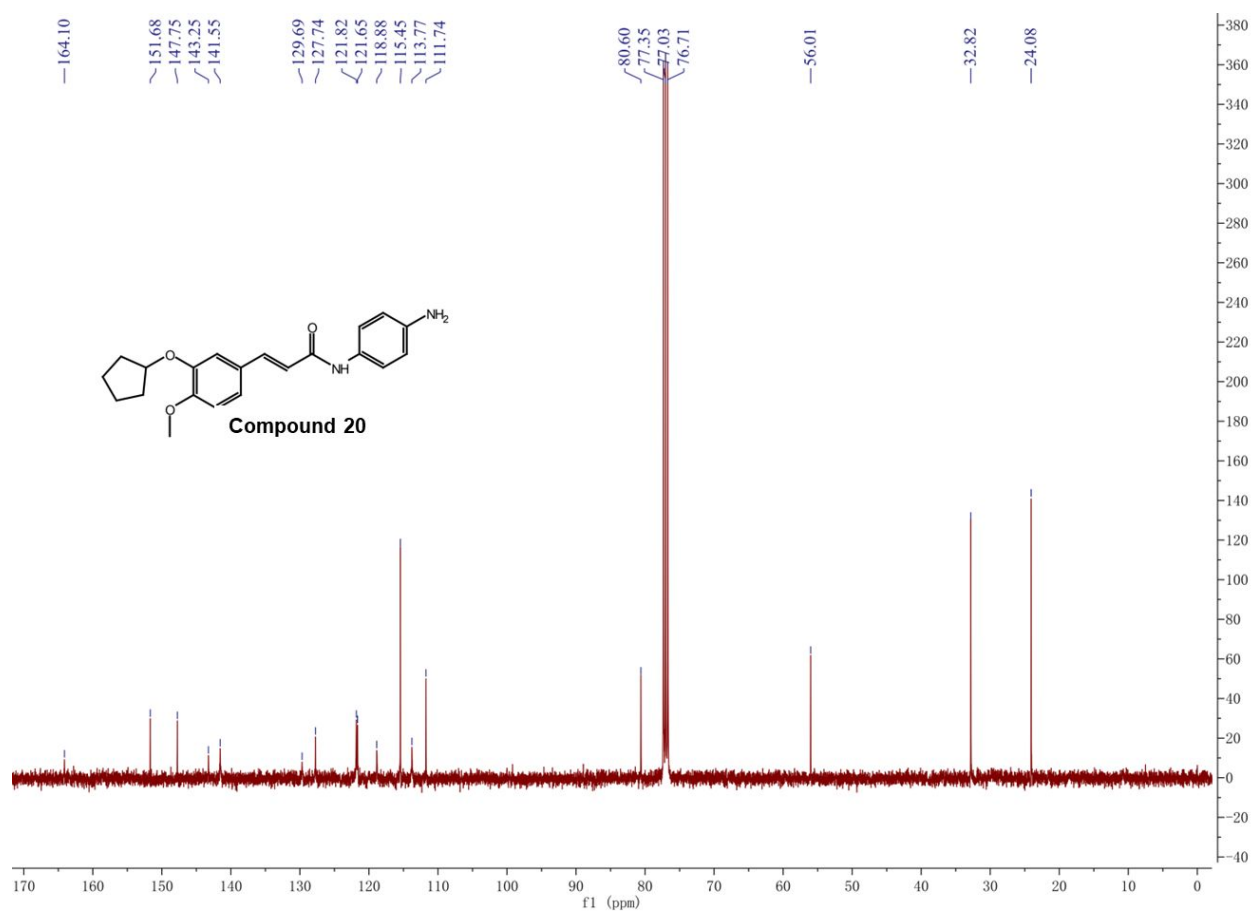

<sup>13</sup>C NMR compound 20

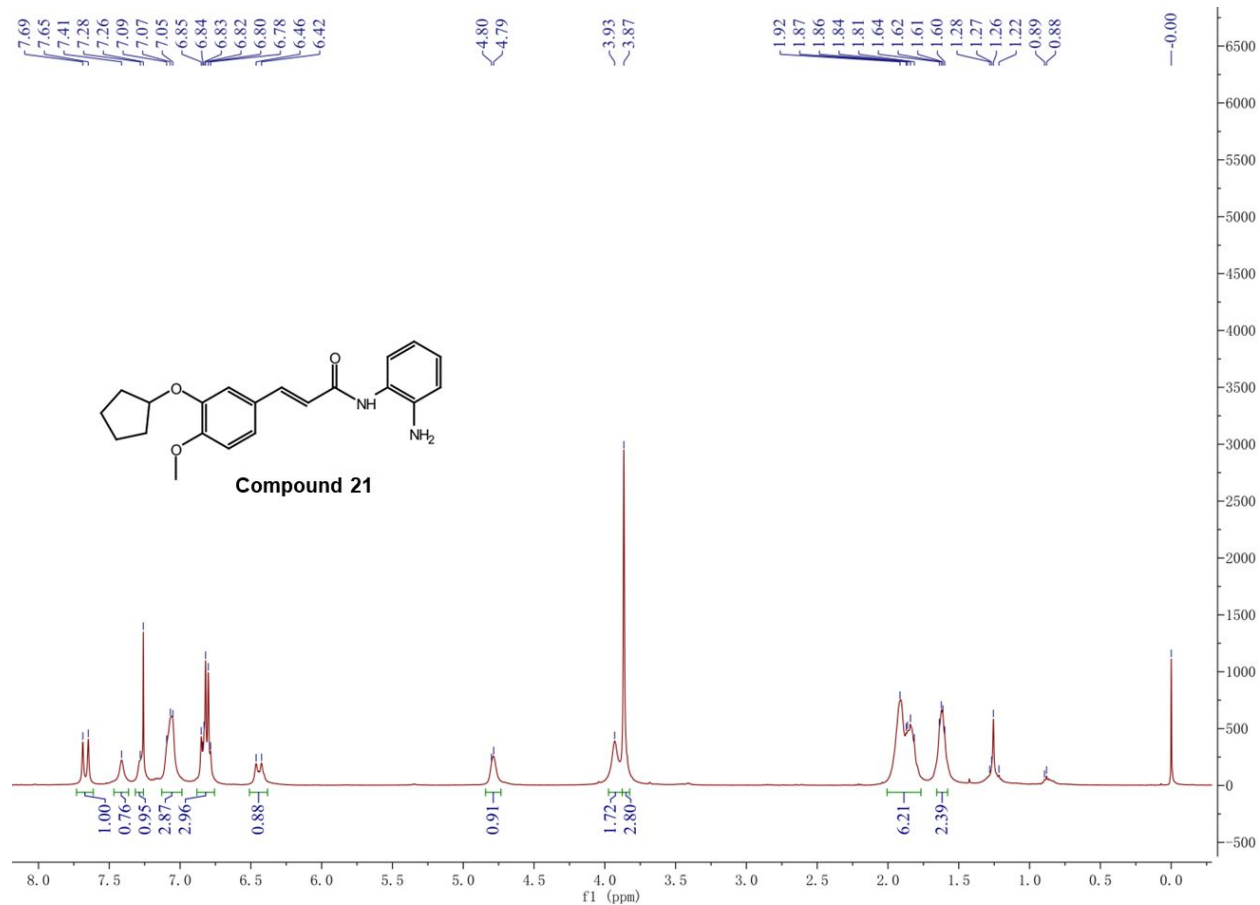

<sup>1</sup>H NMR compound 21

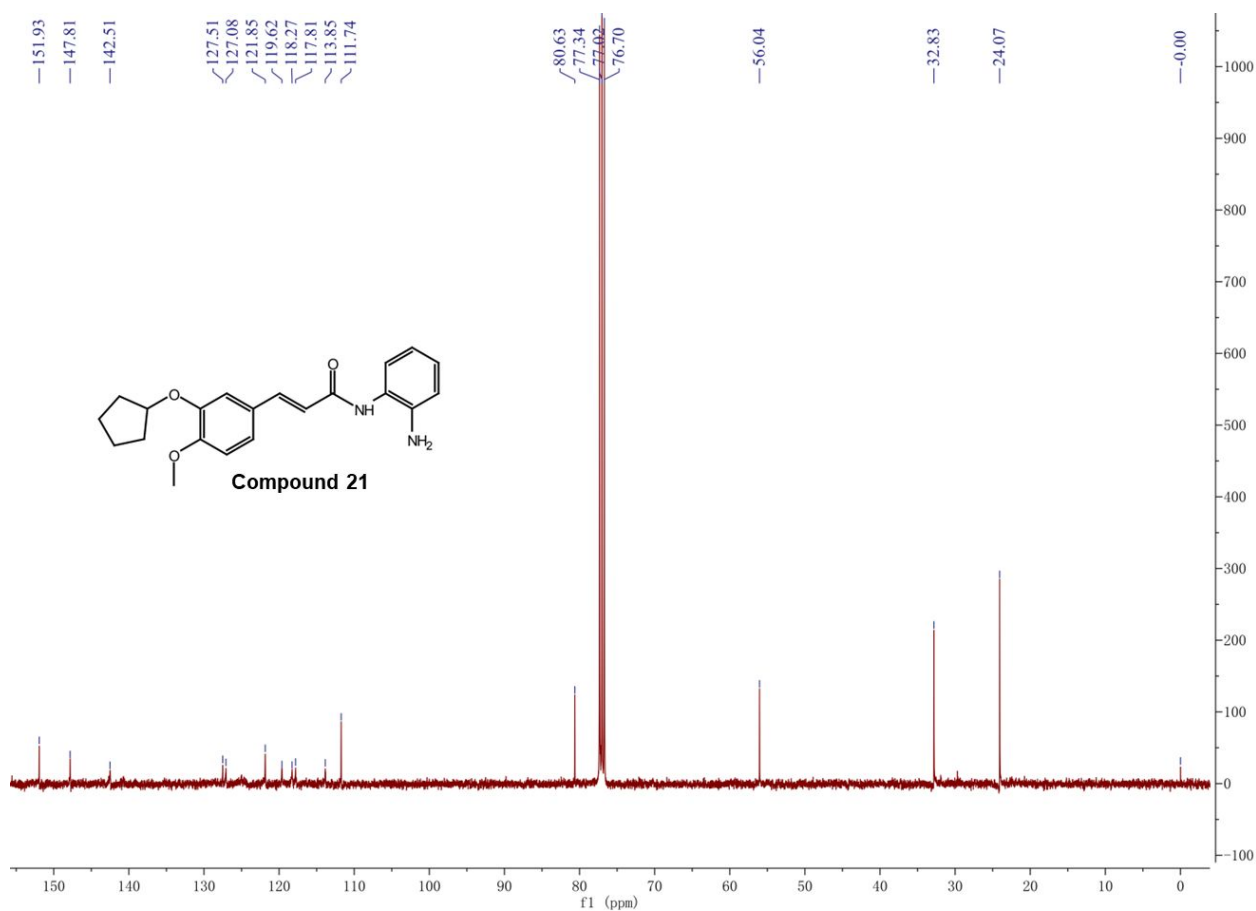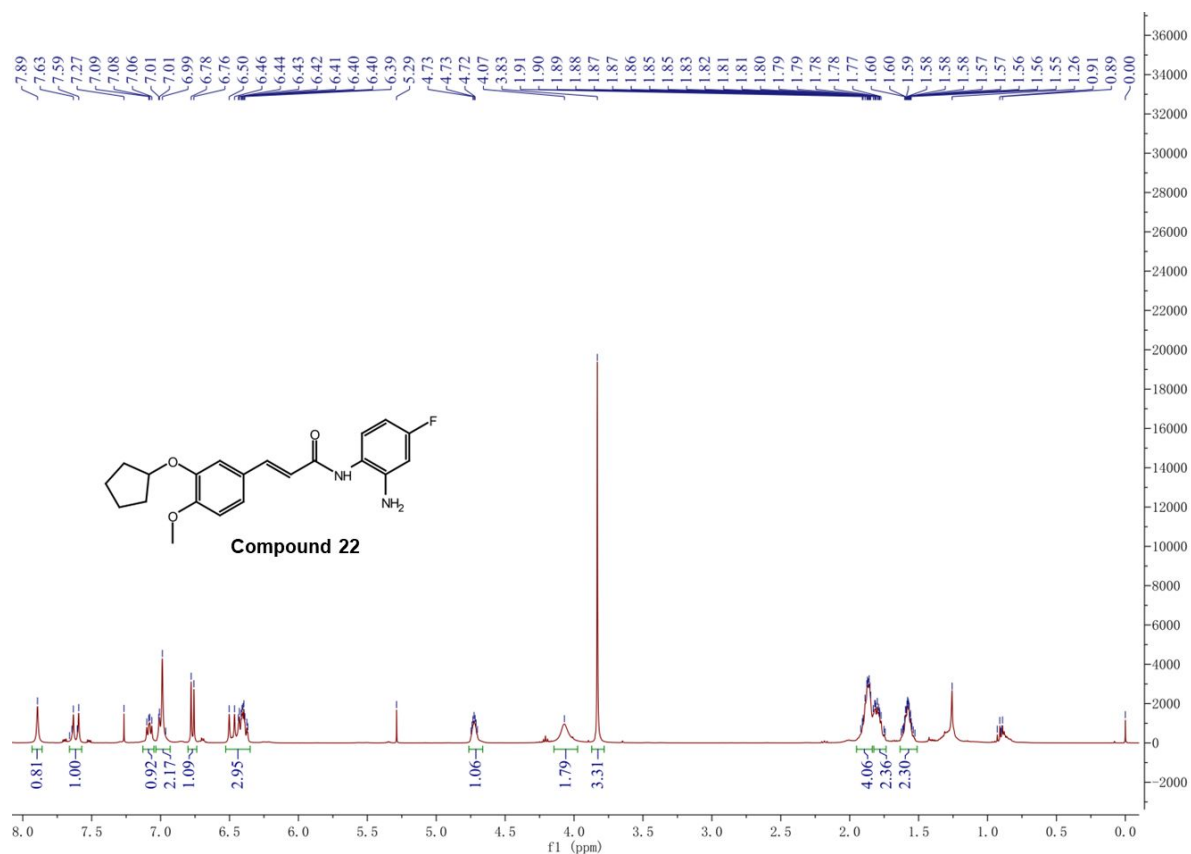

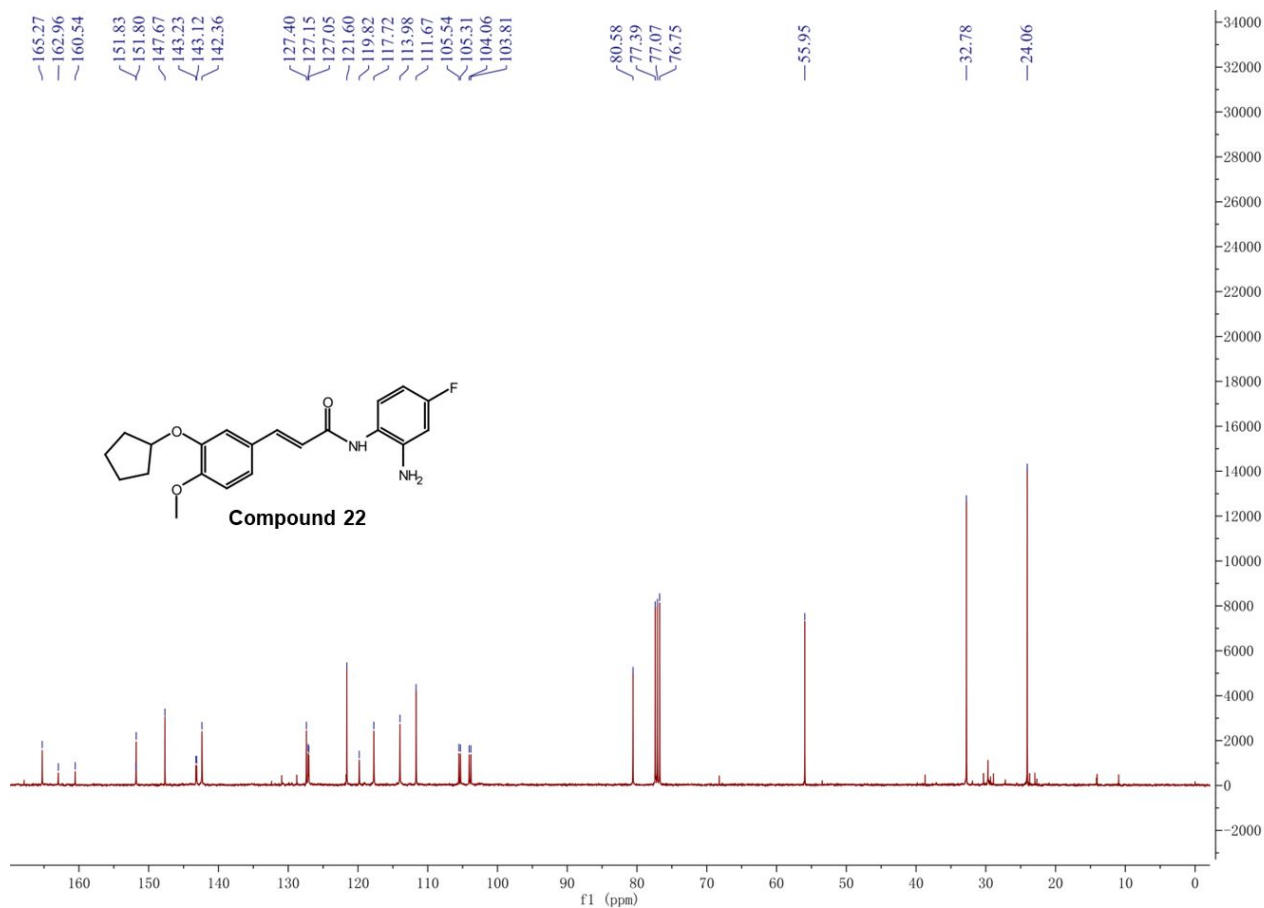

<sup>13</sup>C NMR compound 22

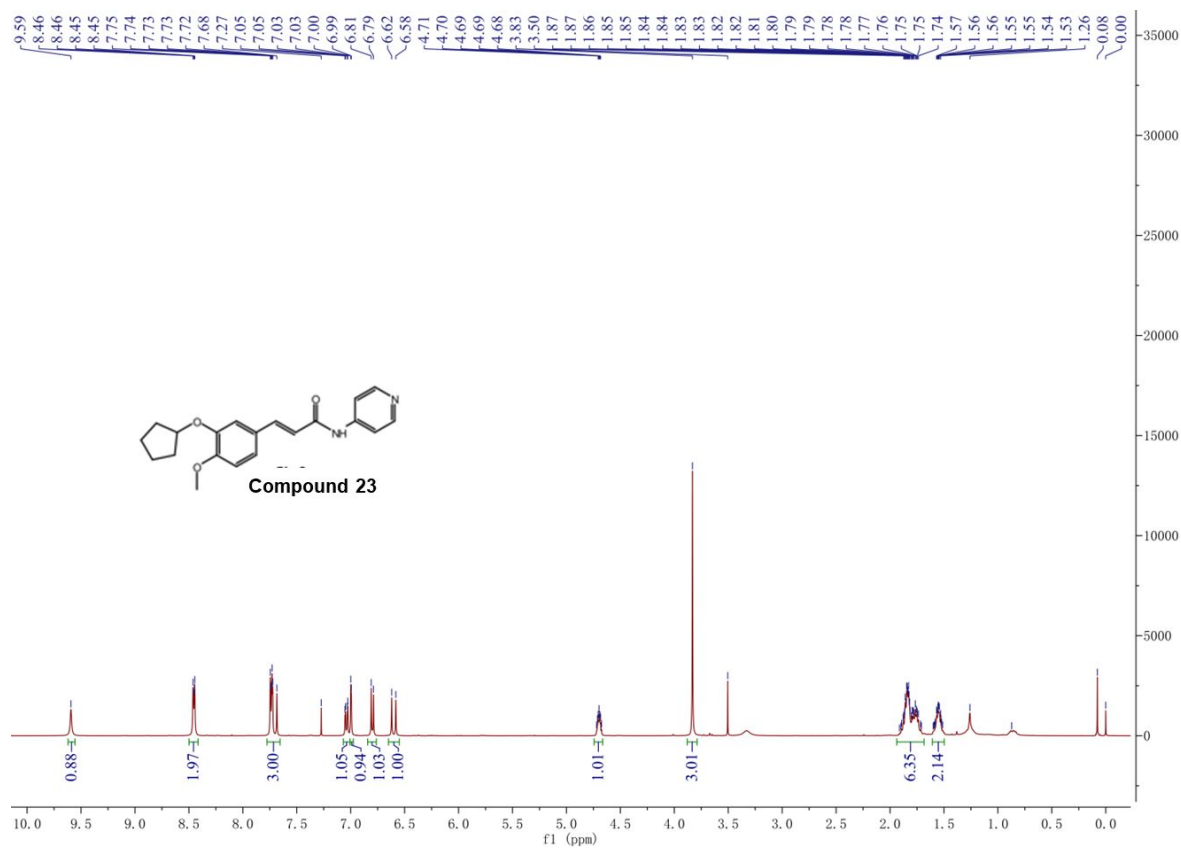

<sup>1</sup>H NMR compound 23

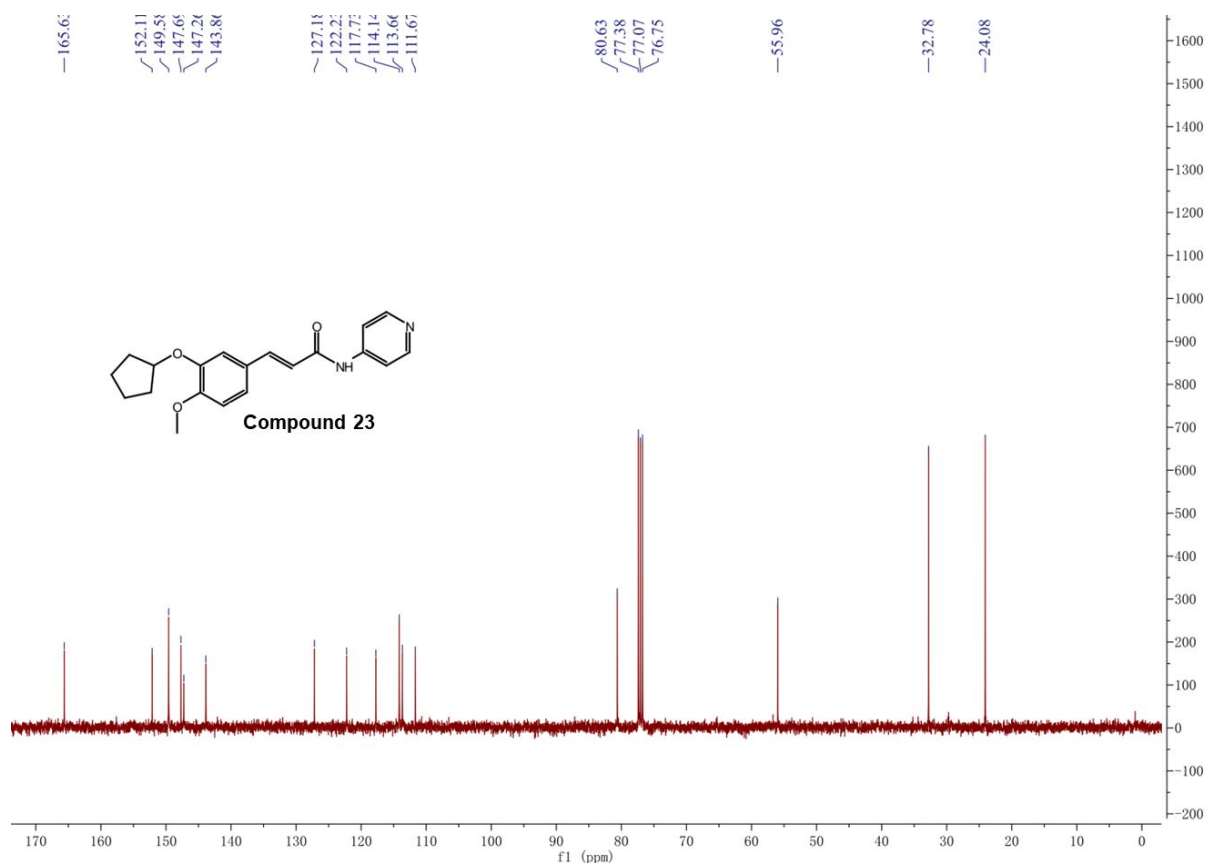

<sup>13</sup>C NMR compound 23

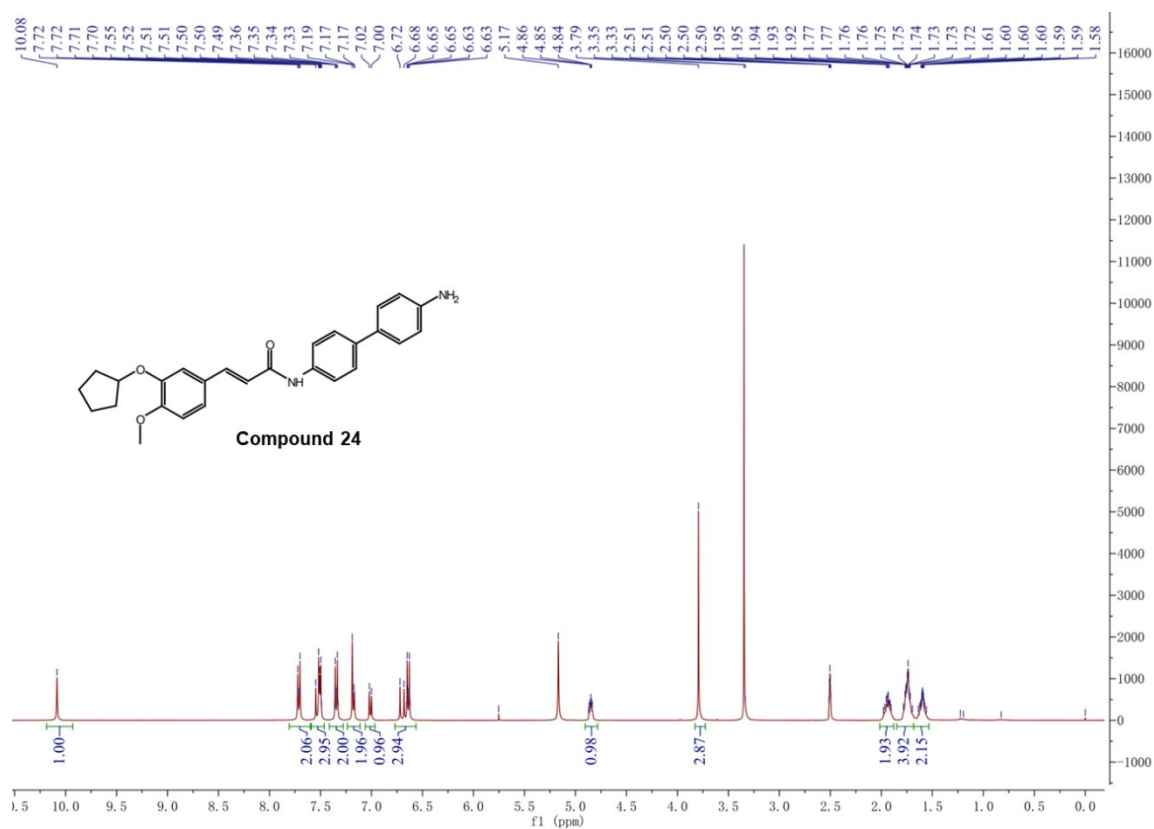

<sup>1</sup>H NMR compound 24

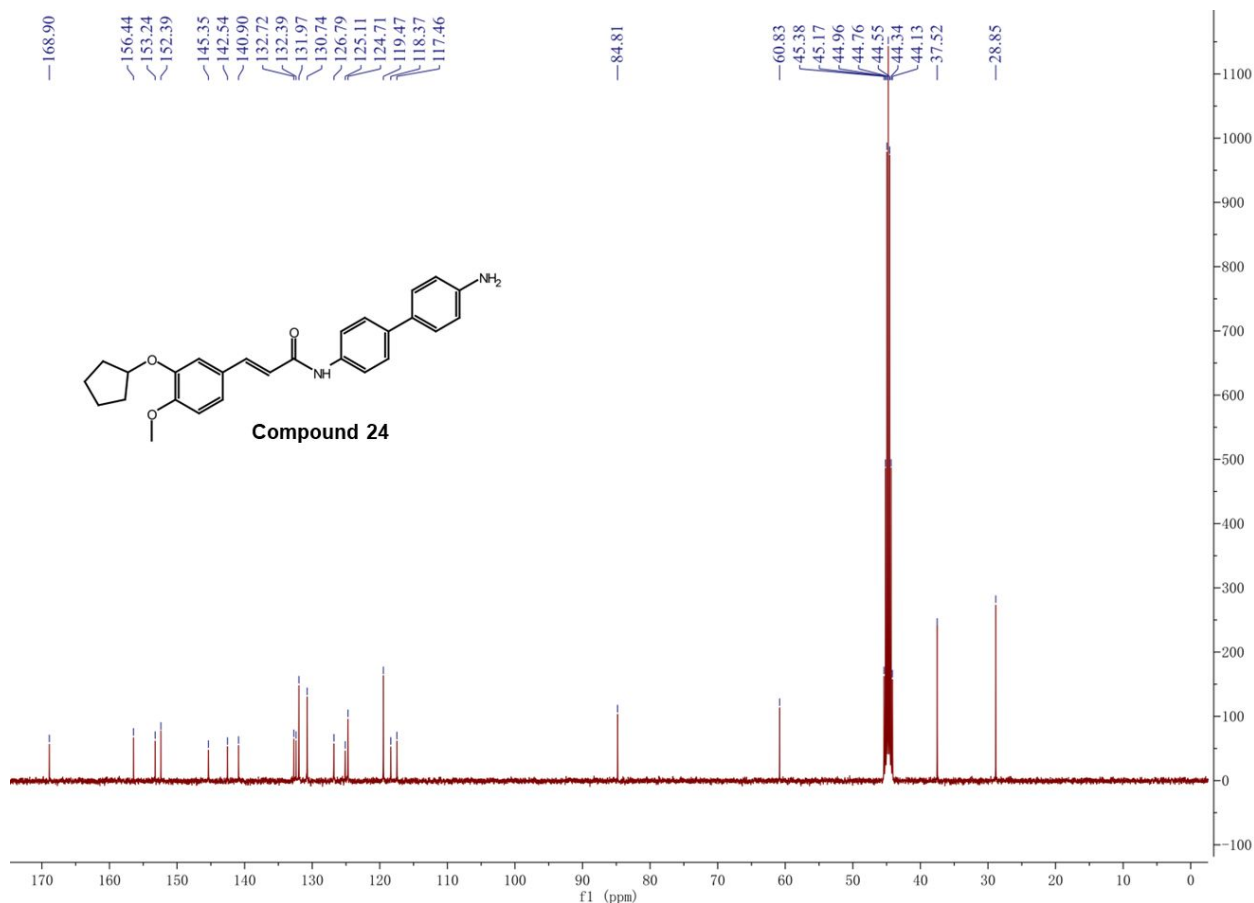

<sup>13</sup>C NMR compound 24

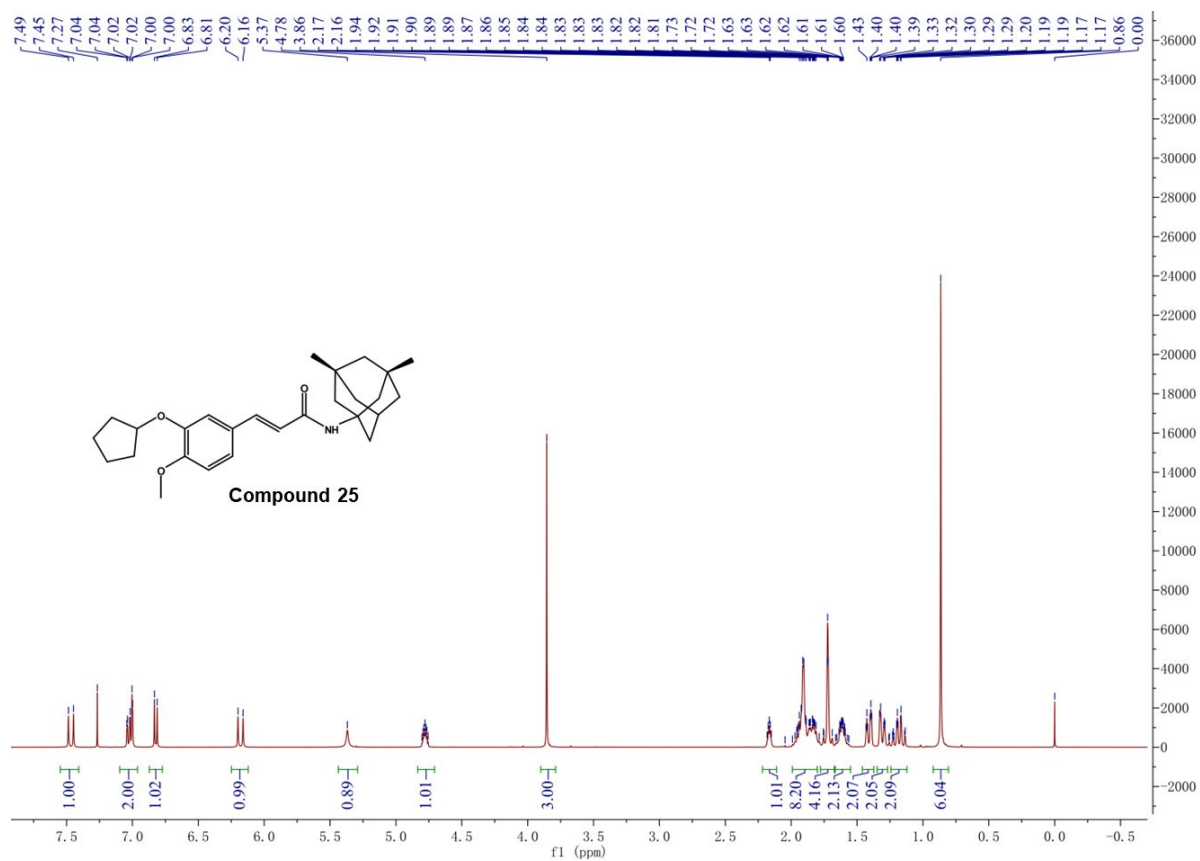

<sup>1</sup>H NMR compound 25



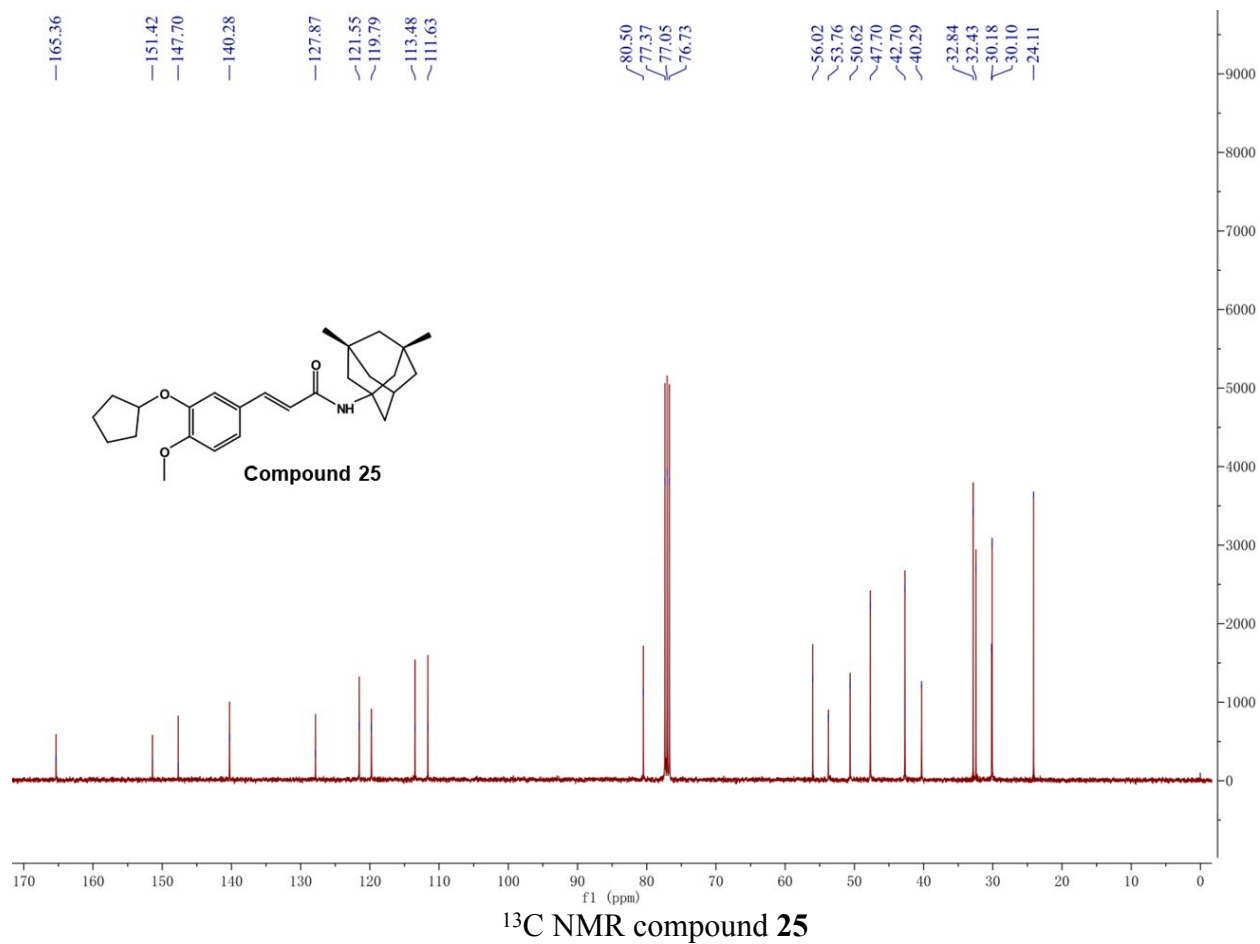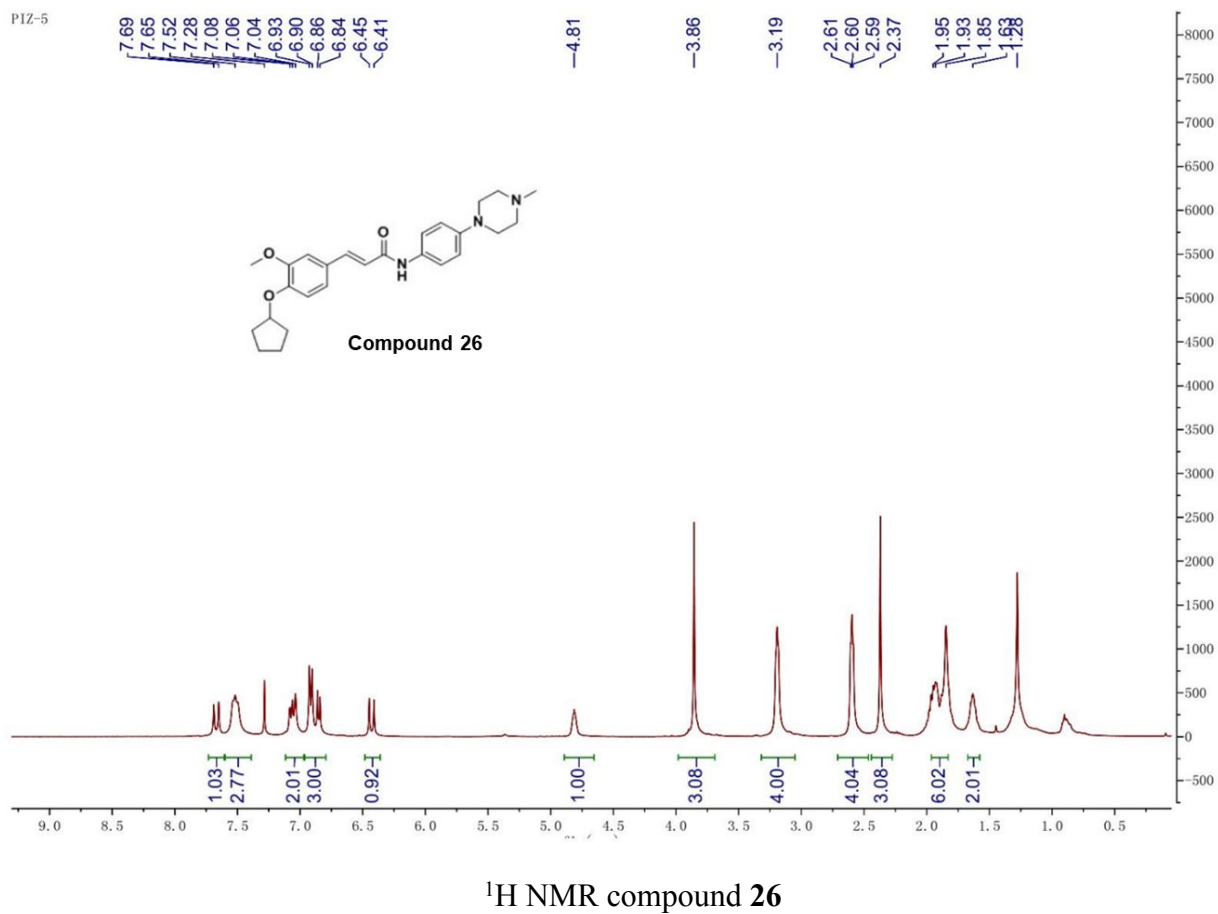

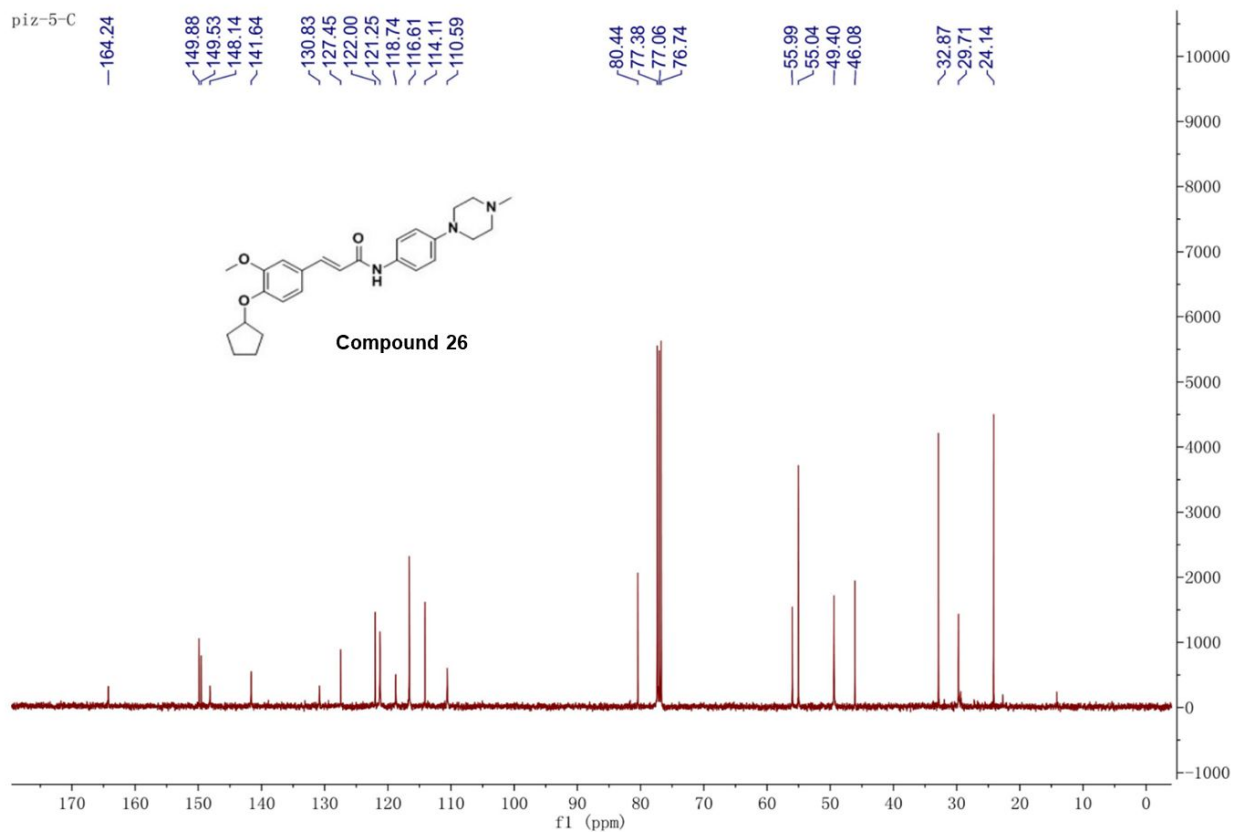

$^{13}\text{C}$  NMR compound **26**

## HPLC of the compound 5

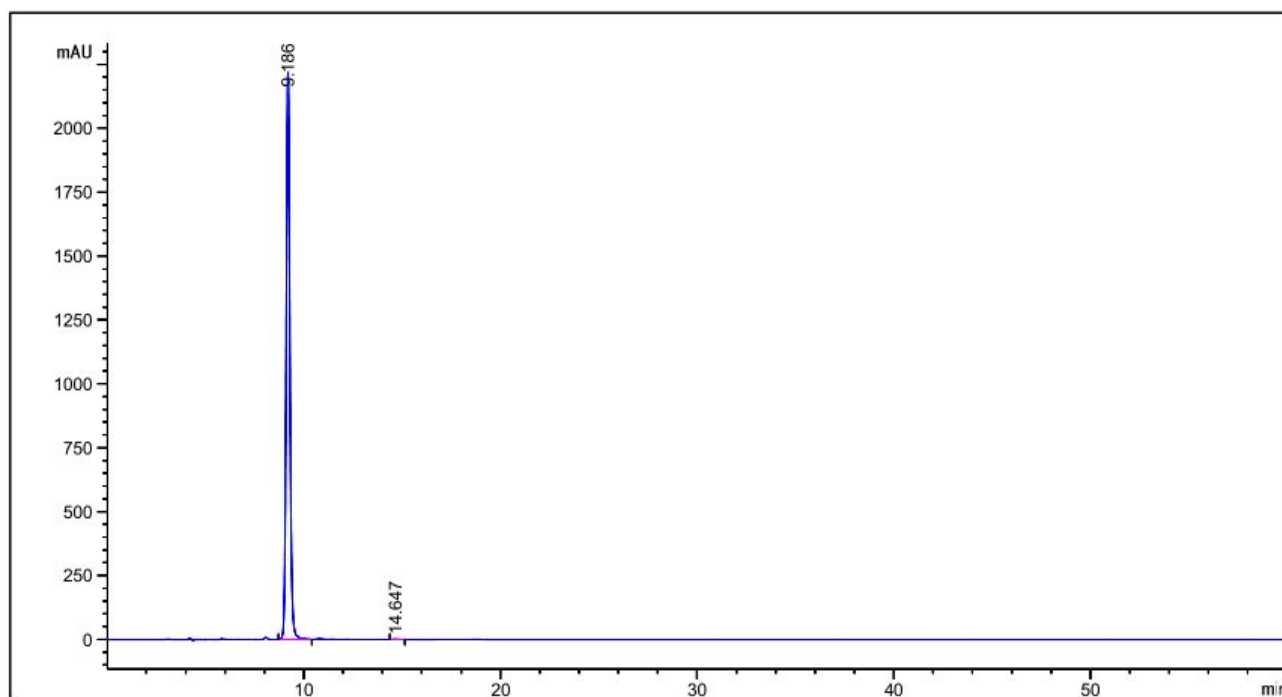

### 面积百分比报告

排序 : 信号  
乘积因子 : 1.0000  
稀释因子 : 1.0000  
内标使用乘积因子和稀释因子

信号 1: DAD1 B, Sig=245,8 Ref=600,100

| 峰 # | 保留时间 [min] | 类型 | 峰宽 [min] | 峰面积 [mAU*s] | 峰高 [mAU]   | 峰面积 %   |
|-----|------------|----|----------|-------------|------------|---------|
| 1   | 9.186      | BB | 0.1995   | 2.88478e4   | 2221.28101 | 99.9197 |
| 2   | 14.647     | BB | 0.2889   | 23.18740    | 1.24707    | 0.0803  |

总量 : 2.88709e4 2222.52808

## HPLC of the compound 6

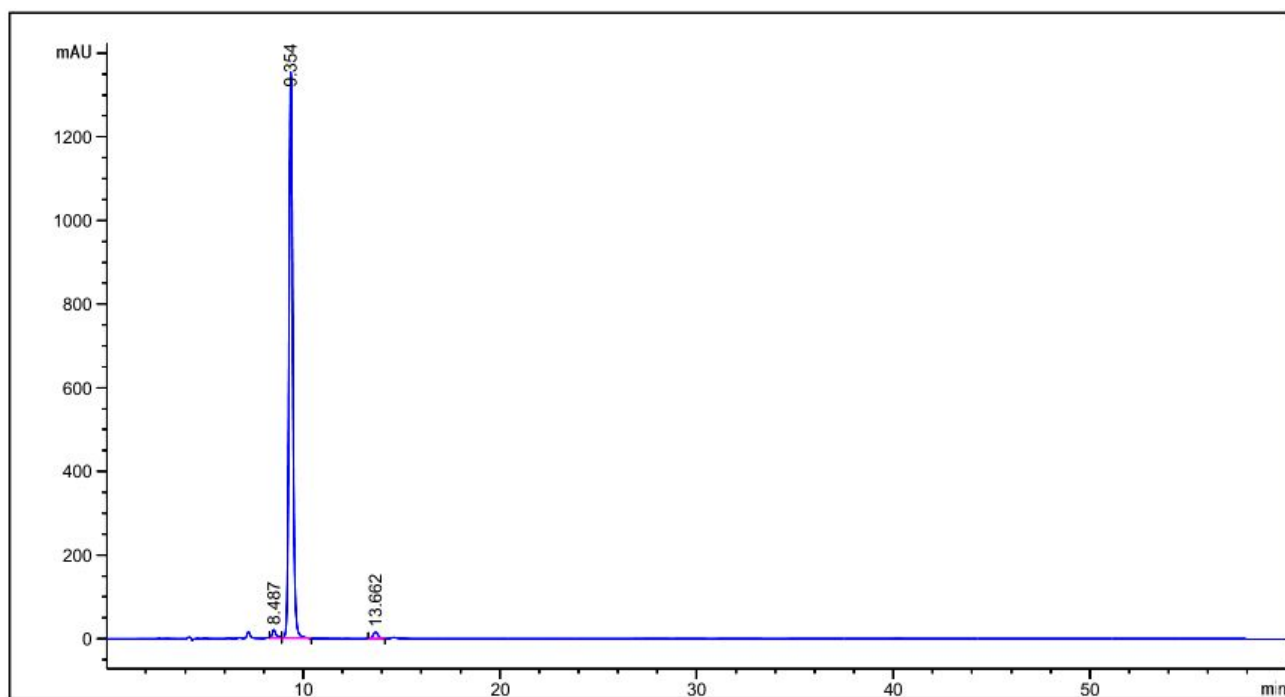

### 面积百分比报告

排序 : 信号  
乘积因子 : 1.0000  
稀释因子 : 1.0000  
内标使用乘积因子和稀释因子

信号 1: DAD1 B, Sig=245,8 Ref=600,100

| 峰 # | 保留时间 [min] | 类型 | 峰宽 [min] | 峰面积 [mAU*s] | 峰高 [mAU]   | 峰面积 %   |
|-----|------------|----|----------|-------------|------------|---------|
| 1   | 8.487      | VV | 0.2219   | 318.17203   | 20.86035   | 1.6928  |
| 2   | 9.354      | VB | 0.2066   | 1.81929e4   | 1354.97571 | 96.7911 |
| 3   | 13.662     | BB | 0.2875   | 284.97760   | 15.28587   | 1.5162  |

总量 : 1.87961e4 1391.12193

## HPLC of the compound 8

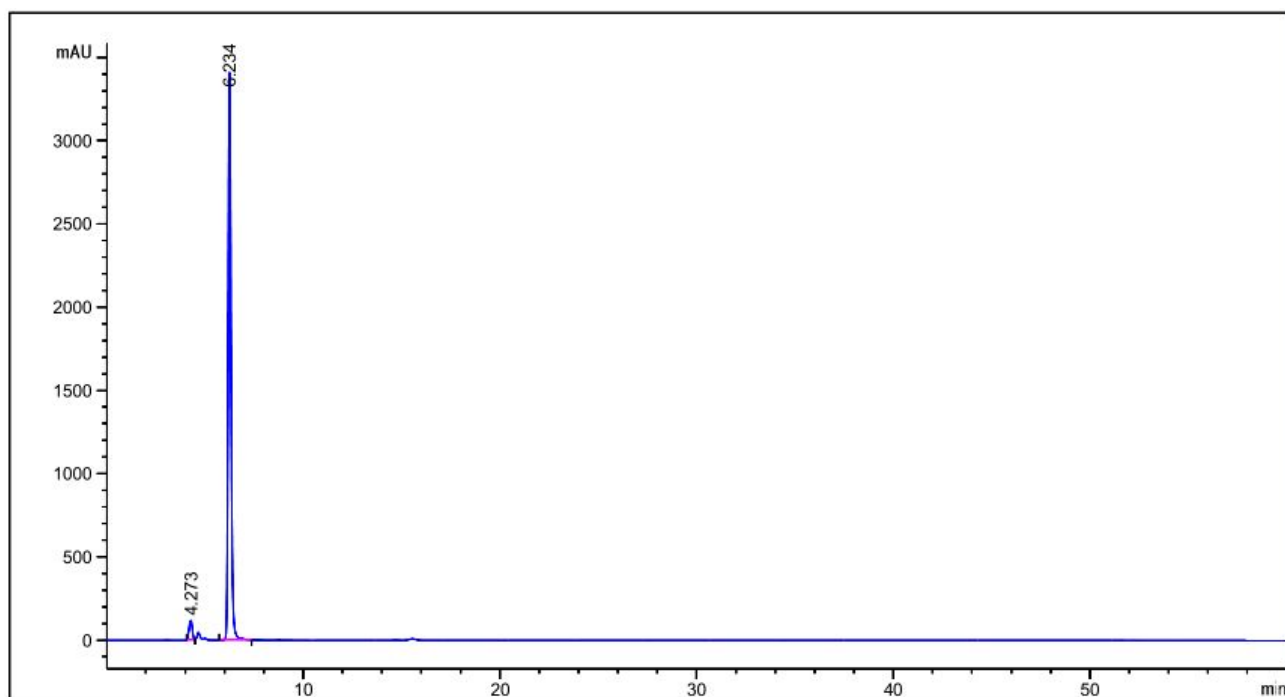

### 面积百分比报告

排序 : 信号  
乘积因子 : 1.0000  
稀释因子 : 1.0000  
内标使用乘积因子和稀释因子

信号 1: DAD1 B, Sig=245,8 Ref=600,100

| 峰 # | 保留时间 [min] | 类型 | 峰宽 [min] | 峰面积 [mAU*s] | 峰高 [mAU]   | 峰面积 %   |
|-----|------------|----|----------|-------------|------------|---------|
| 1   | 4.273      | BV | 0.1878   | 1418.50964  | 118.34002  | 3.9090  |
| 2   | 6.234      | BB | 0.1571   | 3.48701e4   | 3415.00879 | 96.0910 |

总量 : 3.62886e4 3533.34881

## HPLC of the compound 12

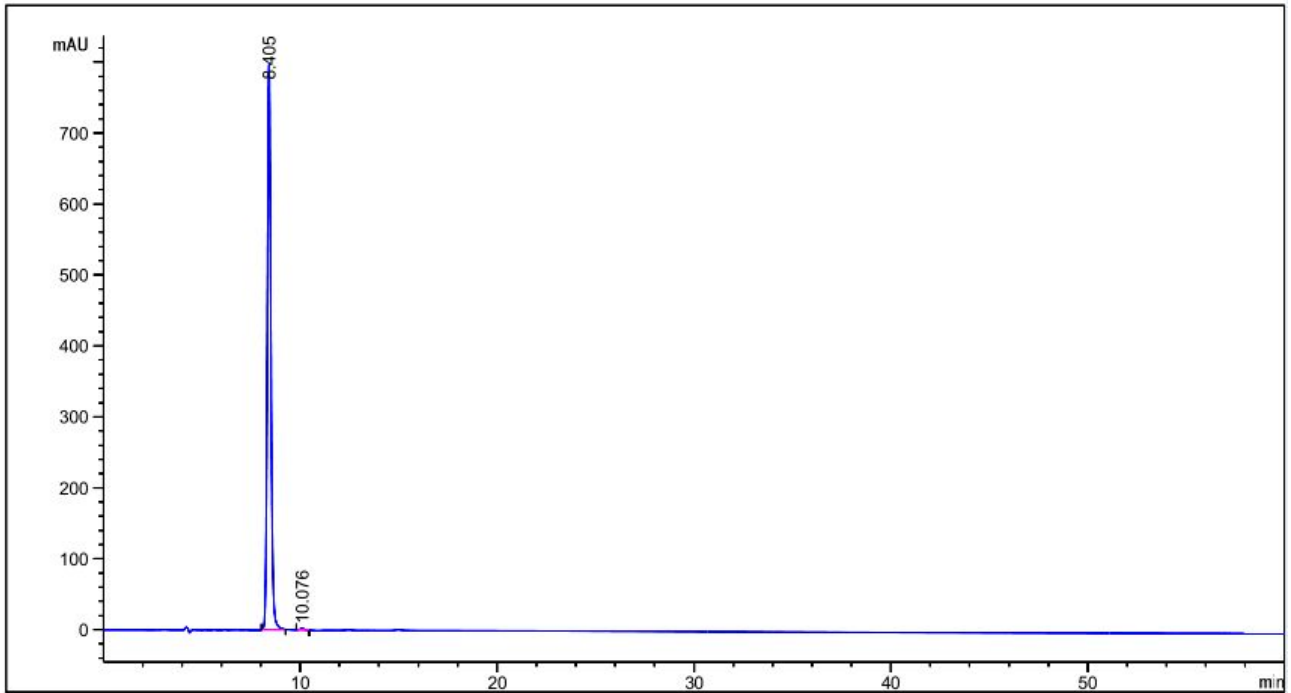

### 面积百分比报告

排序 : 信号  
乘积因子 : 1.0000  
稀释因子 : 1.0000  
内标使用乘积因子和稀释因子

信号 1: DAD1 B, Sig=245,8 Ref=600,100

| 峰 # | 保留时间 [min] | 类型 | 峰宽 [min] | 峰面积 [mAU*s] | 峰高 [mAU]  | 峰面积 %   |
|-----|------------|----|----------|-------------|-----------|---------|
| 1   | 8.405      | BB | 0.1939   | 1.01075e4   | 797.35522 | 99.6091 |
| 2   | 10.076     | BB | 0.2270   | 39.66961    | 2.70633   | 0.3909  |

总量 : 1.01472e4 800.06155

## HPLC of the compound 13

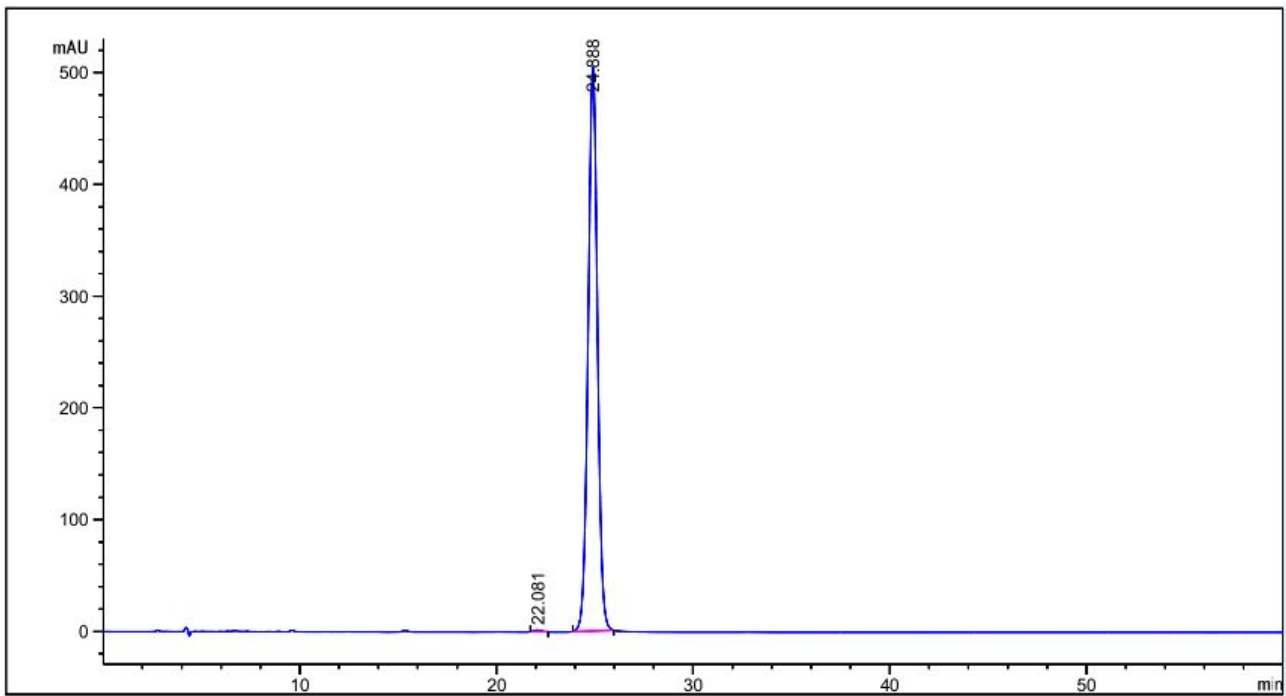

### 面积百分比报告

排序 : 信号  
乘积因子 : 1.0000  
稀释因子 : 1.0000  
内标使用乘积因子和稀释因子

信号 1: DAD1 B, Sig=245,8 Ref=600,100

| 峰 # | 保留时间 [min] | 类型 | 峰宽 [min] | 峰面积 [mAU*s] | 峰高 [mAU]  | 峰面积 %   |
|-----|------------|----|----------|-------------|-----------|---------|
| 1   | 22.081     | BB | 0.3767   | 41.58191    | 1.61355   | 0.2476  |
| 2   | 24.888     | BB | 0.5072   | 1.67497e4   | 504.63580 | 99.7524 |

总量 : 1.67913e4 506.24935

## HPLC of the compound 15

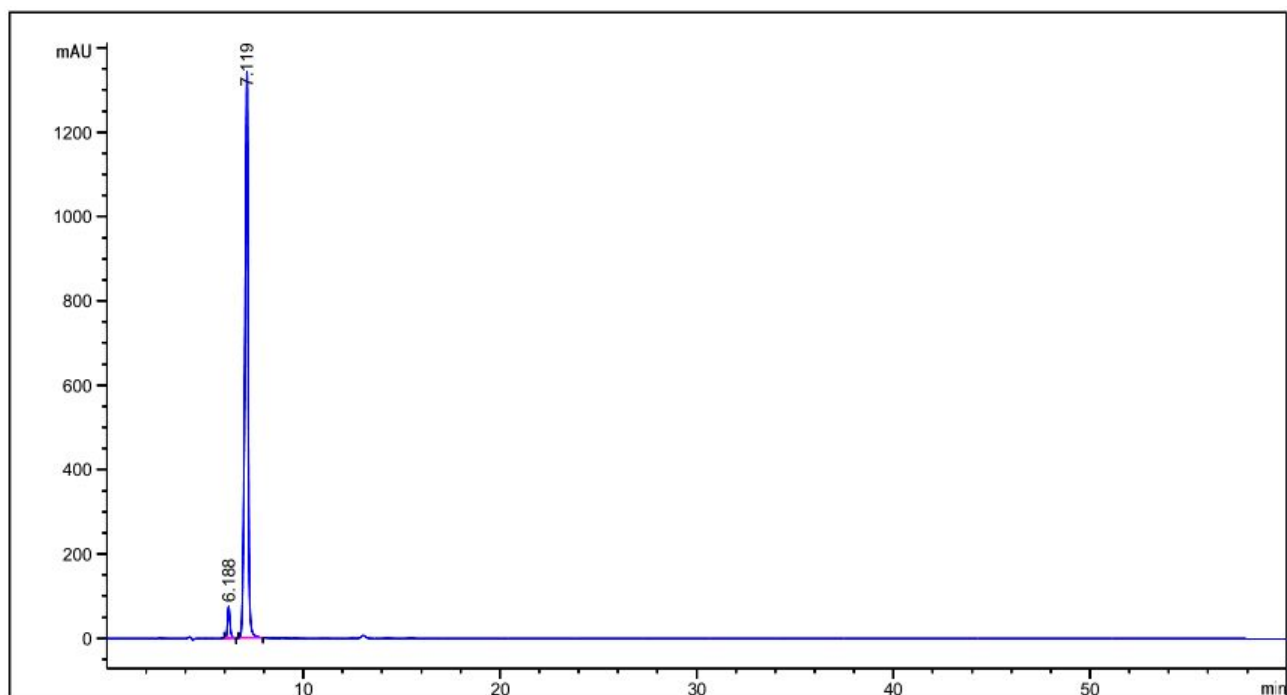

### 面积百分比报告

排序 : 信号  
乘积因子 : 1.0000  
稀释因子 : 1.0000  
内标使用乘积因子和稀释因子

信号 1: DAD1 B, Sig=245,8 Ref=600,100

| 峰 # | 保留时间 [min] | 类型 | 峰宽 [min] | 峰面积 [mAU*s] | 峰高 [mAU]   | 峰面积 %   |
|-----|------------|----|----------|-------------|------------|---------|
| 1   | 6.188      | VB | 0.1329   | 661.24878   | 74.94682   | 4.1464  |
| 2   | 7.119      | BB | 0.1687   | 1.52865e4   | 1344.33643 | 95.8536 |

总量 : 1.59477e4 1419.28324



## HPLC of the compound 18

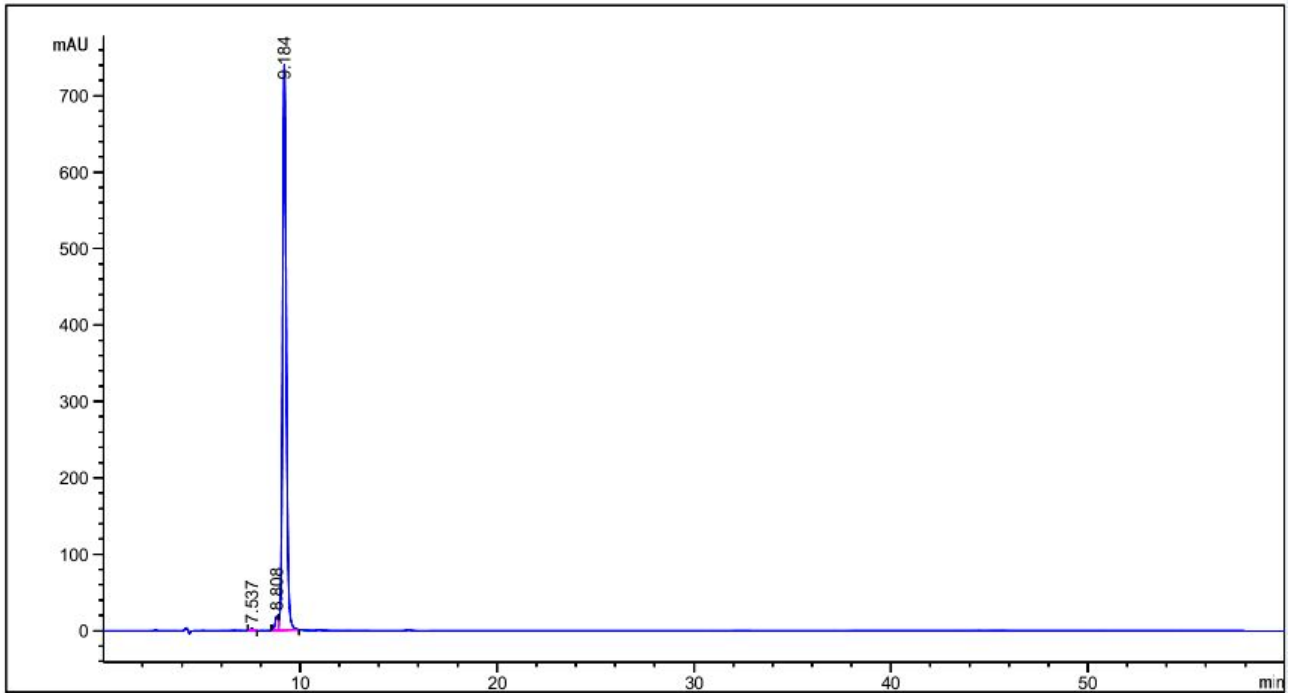

### 面积百分比报告

排序 : 信号  
乘积因子 : 1.0000  
稀释因子 : 1.0000  
内标使用乘积因子和稀释因子

信号 1: DAD1 B, Sig=245,8 Ref=600,100

| 峰 # | 保留时间 [min] | 类型 | 峰宽 [min] | 峰面积 [mAU*s] | 峰高 [mAU]  | 峰面积 %   |
|-----|------------|----|----------|-------------|-----------|---------|
| 1   | 7.537      | BB | 0.1624   | 32.99413    | 3.09491   | 0.3356  |
| 2   | 8.808      | BV | 0.1718   | 212.81509   | 19.13340  | 2.1649  |
| 3   | 9.184      | VB | 0.1970   | 9584.59668  | 740.72864 | 97.4995 |

总量 : 9830.40590 762.95695

## HPLC of the compound 24

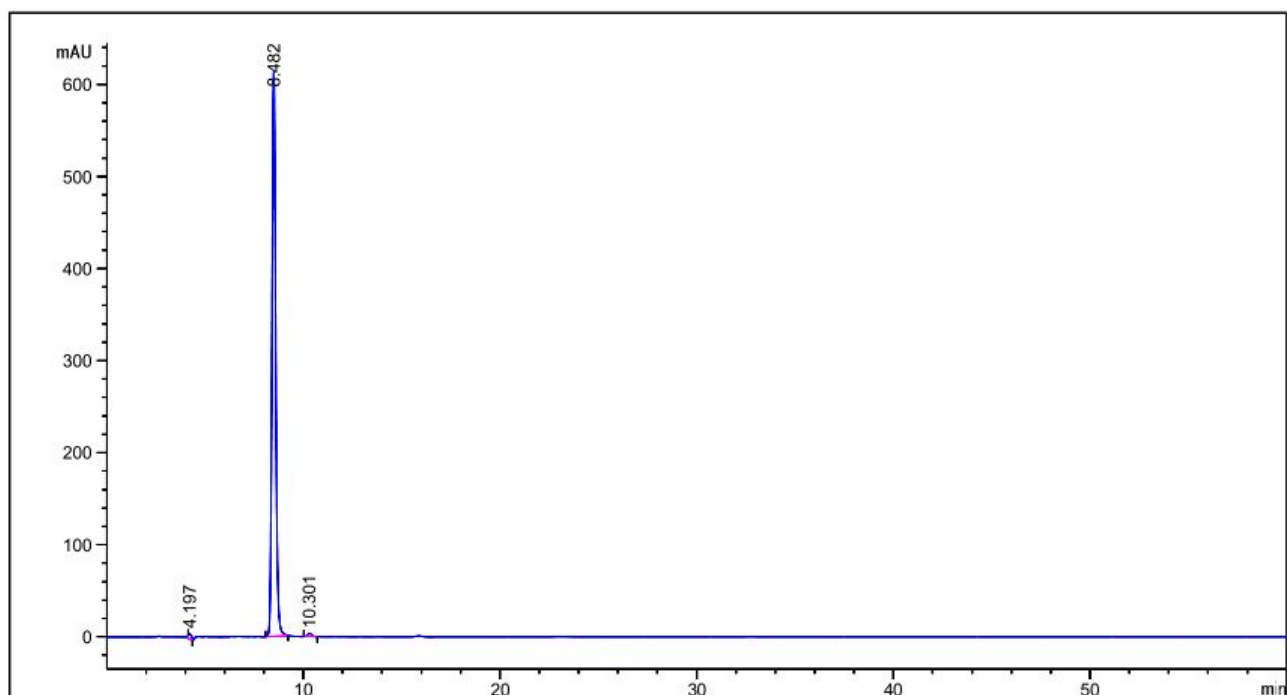

### 面积百分比报告

排序 : 信号  
 乘积因子 : 1.0000  
 稀释因子 : 1.0000  
 内标使用乘积因子和稀释因子

信号 1: DAD1 B, Sig=245,8 Ref=600,100

| 峰 # | 保留时间 [min] | 类型 | 峰宽 [min] | 峰面积 [mAU*s] | 峰高 [mAU]  | 峰面积 %   |
|-----|------------|----|----------|-------------|-----------|---------|
| 1   | 4.197      | VV | 0.1208   | 57.20350    | 6.25036   | 0.7069  |
| 2   | 8.482      | BB | 0.1998   | 7980.43408  | 613.22455 | 98.6188 |
| 3   | 10.301     | BB | 0.2342   | 54.56830    | 3.61273   | 0.6743  |

总量 : 8092.20588 623.08763

## Molecular modeling

Most of the PDE4 inhibitors described to date, including Rolipram and the FDA-approved roflumilast, inhibit all four subfamilies of PDE4. To further understand the binding mode of these Rolipram-Tanilast hybrids, the most active compound **5**, was selected and docked into the PDE4D catalytic pocket (PDB code: 1xoq)<sup>1</sup> using the molecular docking approach glide SP mode.<sup>2, 3</sup>

As shown in Figure 1, the scaffold 4-(cyclopentyloxy)-3-methoxyphenyl group of compound **5** and Rolipram shared similar binding conformations (Figure 1A), these interactions were similar to those of Rolipram (Figure 1B) and were considered as the essential interactions for PDE4 inhibitors.<sup>4</sup> While, comparing to Rolipram, compound **5** formed additional two hydrogen bonds with Asp 318 and Tyr 159 (Figure 1A, B), which might explain its higher potency than that of Rolipram. This model was generally congruent with the above-summarized SARs. The formation of 2H-pyran ring D enhanced the H-bond interactions with the protein residues (Tyr 159 and Asp 318) and thus generated good activity, while the lack of free phenolic hydroxyls at C-5 or C-4' would disturb their hydrogen bond interactions with Gln 369, His 160 or Asp 318, which accounted for a dramatic decrease of the activity.

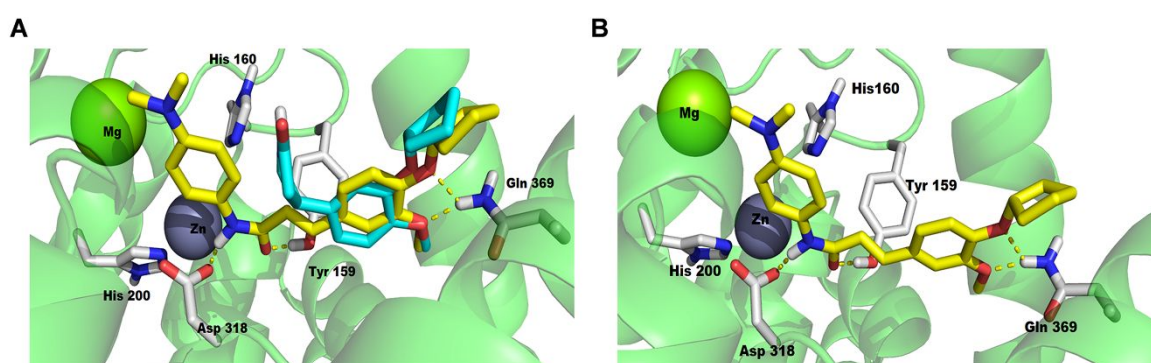

**Figure S1. Binding modes of ligands with PDE4D catalytic pocket (PDB code: 1xoq) derived from docking simulations (yellow dashed lines for hydrogen bond).** Interactions are displayed by yellow dotted lines. Key residues that could form interactions with compound **5** are shown. (A) Comparing binding mode of compound **5** (yellow) and Rolipram (cyan). (B) Binding mode of compound **5**.

## Kinase activity assay

These assays were carried out as described previously.<sup>5</sup> All of the enzymatic reactions were conducted at 25°C for 60 mins. The 50  $\mu$ L reaction mixture contains 40 mM MOPS, pH 7.5, 0.5 mM EDTA, 15 mM MgCl<sub>2</sub>, 0.15 mg/mL BSA, 1 mM DTT, 0.05% Proclin 200, 15 ng/mL PDE4 CAT and 100 nM FAM-Cyclic-3', 5' -AMP. The compounds were diluted in 10% DMSO and 5  $\mu$ L of the dilution was added to a 50  $\mu$ L reaction so that the final concentration of DMSO is 1% in all of reactions. The reaction mixture was incubated at 25°C for 1 h. Then add 100 L diluted binding agent to each well and incubate at 25°C for 1 h with slow shaking. Read the fluorescence polarization of the sample used an excitation filter of 360 nm and an emission filter of 480 nm. The IC<sub>50</sub> values were calculated using nonlinear regression with normalized dose–response fit using Prism GraphPad software.

**Table S1. PDE4B2 and PDE4D7 kinase activity assay of compound 5.**

| Kinase target  | PDE4B2 | PDE4D7 |
|----------------|--------|--------|
| Inhibition (%) | 0      | 6      |

## References

- (1). Card, G. L., England, B. P., Suzuki, Y., Fong, D., Powell, B., Lee, B., Luu, C., Tabrizizad, M., Gillette, S., Ibrahim, P. N., Artis, D. R., Bollag, G., Milburn, M. V., Kim, S. H., Schlessinger, J., Zhang, K. Y. J., (2004) Structural basis for the activity of drugs that inhibit phosphodiesterases. *Structure* 12, 2233-2247.
- (2). Friesner, R. A., Banks, J. L., Murphy, R. B., Halgren, T. A., Klicic, J. J., Mainz, D. T., Repasky, M. P., Knoll, E. H., Shelley, M., Perry, J. K., Shaw, D. E., Francis, P., Shenkin, P. S., (2004) Glide: a new approach for rapid, accurate docking and scoring. 1. Method and assessment of docking accuracy. *J. Med. Chem.* 47, 1739-1749.
- (3). Halgren, T. A., Murphy, R. B., Friesner, R. A., Beard, H. S., Frye, L. L., Pollard, W. T., Banks, J. L., (2004) Glide: a new approach for rapid, accurate docking and scoring. 2. Enrichment factors in database screening. *J. Med. Chem.* 47, 1750-1759.
- (4). Huai, Q., Wang, H. C.; Sun, Y. J., Kim, H. Y., Liu, Y. D., Ke, H. M., (2003) Three-dimensional structures of PDE4D in complex with roliprams and implication on inhibitor selectivity. *Structure* 11, 865-873.
- (5). Huang, W., Zhang, Y., Sportsman, JR., (2002) A fluorescence polarization assay for cyclic nucleotide phosphodiesterases. *J. Biomol. Screen.* 7, 3, 215–222.
